# Supplementary material for: Inverse modelling for predicting both water and nitrate movement in a structured-clay soil (Red Ferrosol)
Source: PeerJ. 2019 Jan 16;6:e6002. doi: 10.7717/peerj.6002 (PMC6339475; doi:10.7717/peerj.6002)
Supplement: Supplemental Information 2 — Data tables for nitrate, water content and modelled outputs used for SET B graphs presented in the paper. [file peerj-07-6002-s002.xls]

## Sheet: Dilute
Time (min)	section	tube mass	soil + tube	Oven dry	soil + tube + water	water extract tube	tube + water extract	remain after eth 2 wash	soil + kcl 1	KCl 1 remain	soil + kcl 2	KCl 2 remain	soil + kcl 3	KCl 3 remain	soil + kcl 4	KCl 4 remain	Sec Length (cm)		TetaG diluted (g/g)	TetaG (g/g)	TetaV [cc/cc]	Rho [g/cc]	Rho [g/cc]	Average Rho [g/cc]	Normalised Teta V (cc/cc)		mid-x [cm]		New section water (cc/cm2))	Sorptivity (cc/cm2/t1/2)	Sorptivity sum (cc/cm2/t1/2)	X [cm/sec1/2]	X/S (avg S)				Soil N sorptivity Total N [ug/g cm/sec1/2]	Conc of Applied Solution	Solute Front [cm/sec1/2]		mass soil at sampling (g)	Mass oven dry soil (g)	mass water extract (g)	mass water in soil (g)	Mass remaining soil+water/eth (cc)	Volume water remaining (cc)	Mass KCL extract 1 (g)	Vol KCL extract 1 (cc)	Mass KCL extract 2-4 (g)
80	1	14.197	19.683	17.727	37.11	14.286	30.358	20.252	42.653	20.615	42.66	20.946	43.042	20.842	42.756	22.558	0.979		5.49093	0.554108	0.583475	1.053	1.14759	1.053	0.583475		0.4895		0.424372	0.00612529	0.119844	0.00706532	0.0589542		13.2085	2.42964	1.0612	12.8876			5.486	3.53	17.427	1.956	6.055	2.525	22.401	20.5514	66.055
	2	14.204	18.97	17.259	36.455	14.252	30.979	19.69	42.097	19.929	42.295	20.144	42.539	20.124	42.39	19.981	0.952		6.28347	0.560065	0.589749	1.053	1.02133	6.79326e-16	0.589749		1.455		0.418641	0.00604256		0.0210011	0.175237				1.04004				4.766	3.055	17.485	1.711	5.486	2.431	22.407	20.5569	67.027
	3	14.244	19.457	17.657	36.902	14.078	30.181	20.191	42.54	20.587	42.989	20.781	43.205	20.833	43.093	20.782	1.043		5.63873	0.527395	0.555347	1.053	1.04147		0.555347		2.4525		0.422777	0.00610226		0.0353988	0.295373				1.06992				5.213	3.413	17.445	1.8	5.947	2.534	22.349	20.5037	67.086
	4	12.664	25.512	21.17	66.716	14.197	51.959	26.596	70.814	27.704	72.486	27.971	72.669	27.865	72.386	27.461	2.562		5.35457	0.510463	0.537518	1.053	1.05667		0.537518		4.255		0.99282	0.0143301		0.0614156	0.512462				2.56287				12.848	8.506	41.204	4.342	13.932	5.426	44.218	40.567	134.001
	5	14.208	19.57	17.738	37.14	14.207	30.776	20.345	42.686	20.728	43.061	20.868	43.218	20.967	43.243	20.992	1.046		5.49632	0.51898	0.546486	1.053	1.07408		0.546486		6.059		0.414724	0.00598603		0.0874541	0.729732				0.960891				5.362	3.53	17.57	1.832	6.137	2.607	22.341	20.4963	66.959
	6	14.048	19.082	17.342	36.543	14.22	30.659	19.85	42.211	19.954	42.296	20.253	42.647	20.451	42.745	20.7	0.994		5.82908	0.528233	0.55623	1.053	1.05471		0.55623		7.079		0.403792	0.00582824		0.102177	0.852578				0.993681				5.034	3.294	17.461	1.74	5.802	2.508	22.361	20.5147	67.03
	7	12.11	17.371	15.536	34.911	14.111	30.666	18.106	40.449	18.154	40.503	18.547	40.92	18.658	40.914	18.739	1.044		5.65528	0.53561	0.563997	1.053	1.04443		0.563997		8.098		0.432213	0.00623846		0.116885	0.975304				1.04186				5.261	3.426	17.54	1.835	5.996	2.57	22.343	20.4982	66.978
	8	14.12	19.257	17.491	36.771	14.11	30.056	19.99	42.497	20.174	42.508	20.377	42.733	20.6	42.836	20.502	1.014		5.71937	0.52388	0.551646	1.053	1.05807		0.551646		9.127		0.407269	0.00587842		0.131737	1.09923				0.95968				5.137	3.371	17.514	1.766	5.87	2.499	22.507	20.6486	66.926
	9	12.897	17.571	15.964	35.095	14.05	30.154	18.32	40.704	18.325	40.798	18.708	41.086	18.869	41.142	18.826	0.956		6.23769	0.523965	0.551735	1.053	1.02106		0.551735		10.112		0.384059	0.00554341		0.145954	1.21787				0.842752				4.674	3.067	17.524	1.607	5.423	2.356	22.384	20.5358	67.124
	10	12.534	17.617	15.85	35.046	14.046	30.529	18.349	40.697	18.521	40.901	18.862	41.248	18.96	41.263	18.88	1.002		5.7889	0.532871	0.561113	1.053	1.05327		0.561113		11.091		0.411935	0.00594577		0.160085	1.33577				0.80698				5.083	3.316	17.429	1.767	5.815	2.499	22.348	20.5028	67.069
	11	14.318	19.513	17.716	37	14.258	30.704	20.307	42.654	20.29	42.621	20.628	43.026	20.884	43.138	20.802	1.04		5.6751	0.52884	0.556869	1.053	1.03988		0.556869		12.112		0.423144	0.00610755		0.174822	1.45874				0.720378				5.195	3.398	17.487	1.797	5.989	2.591	22.347	20.5018	66.983
	12	12.458	17.765	15.994	35.253	12.644	28.616	18.563	40.889	18.686	41.067	18.873	41.253	19.204	41.458	19.044	1.038		5.44655	0.500848	0.527393	1.053	1.0842		0.527393		13.151		0.391734	0.0056542		0.189818	1.58388				0.439713				5.307	3.536	17.488	1.771	6.105	2.569	22.326	20.4826	67.015
	13	14.12	19.114	17.423	36.602	12.466	28.368	19.895	42.318	19.964	42.301	20.336	42.713	20.519	42.763	20.323	0.992		5.80654	0.511959	0.539093	1.053	1.05972		0.539093		14.166		0.38598	0.00557114		0.204469	1.70612				0.10877				4.994	3.303	17.488	1.691	5.775	2.472	22.423	20.5716	66.958
	14	14.187	18.986	17.373	36.481	14.217	30.605	19.707	42.078	19.883	42.263	20.145	42.521	20.433	42.668	20.386	0.98		5.99749	0.506277	0.53311	1.053	1.0347		0.53311		15.152		0.375448	0.00541912		0.2187	1.82487				0.0741919				4.799	3.186	17.495	1.613	5.52	2.334	22.371	20.5239	66.991
	15	14.215	19.318	17.631	36.821	14.109	30.364	20.132	42.447	20.293	42.657	20.606	42.902	20.809	43.068	20.664	1.038		5.61768	0.493852	0.520027	1.053	1.0474		0.520027		16.161		0.384088	0.00554383		0.233264	1.94639				0.0411627				5.103	3.416	17.503	1.687	5.917	2.501	22.315	20.4725	66.919
	16	14.204	18.836	17.324	36.34	14.1	30.313	19.747	42.12	19.77	42.164	20.727	43.091	20.306	42.622	20.526	0.934		6.09487	0.484615	0.5103	1.053	1.06317		0.5103		17.147		0.33652	0.00485725		0.247496	2.06514				0.0285895				4.632	3.12	17.504	1.512	5.543	2.423	22.373	20.5257	67.074
	17	14.284	19.018	17.513	36.542	14.166	30.416	20.022	42.367	20.064	42.471	20.518	42.87	20.615	42.92	20.755	0.997		5.89316	0.466089	0.490791	1.053	1.03078		0.490791		18.1125		0.339769	0.00490414		0.261431	2.18143				0.0328105				4.734	3.229	17.524	1.505	5.738	2.509	22.345	20.5	67.064
	18	14.202	19.198	17.662	36.741	14.169	29.98	20.243	42.547	20.453	42.808	20.6	42.963	20.934	43.226	20.755	1.046		5.51416	0.443931	0.467459	1.053	1.05278		0.467459		19.134		0.332062	0.0047929		0.276176	2.30445				0.0341806				4.996	3.46	17.543	1.536	6.041	2.581	22.304	20.4624	67.01
	19	14.245	18.955	17.55	36.444	14.292	30.426	20.044	42.375	20.127	42.494	20.74	43.06	20.697	42.931	21.005	1.02		5.71679	0.425113	0.447644	1.053	1.03125		0.447644		20.167		0.303597	0.00438205		0.291086	2.42887				0.0269525				4.71	3.305	17.489	1.405	5.799	2.494	22.331	20.4872	66.921
	20	14.072	18.633	17.363	36.09	14.269	29.916	19.806	42.048	19.84	42.181	20.235	42.593	20.43	42.681	20.468	0.986		5.69037	0.385901	0.406354	1.053	1.06229		0.406354		21.17		0.252765	0.00364834		0.305563	2.54967				0.0269153				4.561	3.291	17.457	1.27	5.734	2.443	22.242	20.4055	66.95
	21	12.814	16.531	15.986	34.005	14.109	29.391	18.304	40.612	18.45	40.823	18.778	41.178	18.994	41.238	18.915	0.974		5.68064	0.171816	0.180922	1.053	1.0365		0.180922		22.15		0.0301182	0.000434718		0.319708	2.66769				0.00296298				3.717	3.172	17.474	0.545	5.49	2.318	22.308	20.4661	67.017
	22	14.063	17.926	17.413	35.423	14.123	29.087	19.983	42.264	20.197	42.79	20.326	42.691	20.577	42.857	20.439	1.008		5.37612	0.153134	0.16125	1.053	1.05774		0.16125		23.141		0.0113405	0.000163685		0.334012	2.78705				0.00348852				3.863	3.35	17.497	0.513	5.92	2.57	22.281	20.4413	67.238
	23	12.902	16.667	16.184	34.183	14.1	29.453	18.593	40.915	18.762	41.133	18.927	41.227	19.196	41.498	19.221	0.996		5.48416	0.147166	0.154966	1.053	1.04875		0.154966		24.143		0.00494631	7.13939e-05		0.348474	2.90773				0.00258218				3.765	3.282	17.516	0.483	5.691	2.409	22.322	20.4789	66.973
	24	14.079	18.908	18.286	36.365	14.106	28.782	21.288	43.577	21.406	43.846	22.932	44.238	22.28	44.557	22.149	1.26		4.29736	0.147849	0.155685	1.053	1.06266		0.155685		25.271		0.00716286	0.000103387		0.364755	3.04358				0.00225443				4.829	4.207	17.457	0.622	7.209	3.002	22.289	20.4486	66.023
	25	14.188	18.983	18.364	36.45	14.219	28.92	21.351	43.637	21.551	43.905	22.053	44.421	22.258	44.578	22.135	1.276		4.33094	0.148228	0.156084	1.053	1.04161		0.156084		26.539		0.00776325	0.000112053		0.383057	3.1963				0.000244202				4.795	4.176	17.467	0.619	7.163	2.987	22.286	20.4459	67.042
	26	12.642	22.225	21.019	63.396	14.261	50.386	26.375	70.568	27.424	72.049	27.36	72.067	27.206	71.676	27.577	2.512		5.05873	0.143966	0.151596	1.053	1.06136		0.151596		28.433		0.00400864	5.78598e-05		0.410395	3.4244				0.00256119				9.583	8.377	41.171	1.206	13.733	5.356	44.193	40.544	133.802
																													sorp
Time (min)	section	tube mass	soil + tube	Oven dry	soil + tube + water	water extract tube	tube + water extract	remain after eth 2 wash	soil + kcl 1	KCl 1 remain	soil + kcl 2	KCl 2 remain	soil + kcl 3	KCl 3 remain	soil + kcl 4	KCl 4 remain	Sec Length (cm)		TetaG diluted (g/g)	TetaG (g/g)	TetaV [cc/cc]	Rho [g/cc]	Rho [g/cc]	Average Rho [g/cc]	Normalised Teta V (cc/cc)		mid-x [cm]		New section water (cc/cm2))	Sorptivity (cc/cm2/t1/2)	Sorptivity sum (cc/cm2/t1/2)	X [cm/sec1/2]	X/S (avg S)				Soil N sorptivity Total N [cm/sec1/2]	Conc of Applied Solution	Solute Front [cm/sec1/2]		mass soil at sampling (g)	Mass oven dry soil (g)	mass water extract (g)	mass water in soil (g)	Mass remaining soil+water/eth (cc)	Volume water remaining (cc)	Mass KCL extract 1 (g)	Vol KCL extract 1 (cc)	Mass KCL extract 2-4 (g)
320	A1	14.028	19.535	17.526	36.432	12.761	28.704	20.135	42.464	20.57	42.989	20.21	42.552	20.65	42.929	42.929	0.979		5.4048	0.574328	0.593855	1.034	1.13718	1.034	0.593855		0.4895		0.434534	0.00313598	0.116733	0.00353266	0.0302628		12.8656	2.16472	0.540335	12.5871			5.507	3.498	16.897	2.009	6.107	2.609	22.329	20.4853	67.04
	A2	12.824	17.56	15.848	34.773	12.619	29.116	18.117	40.465	18.632	40.96	18.371	40.681	18.676	40.971	40.971	0.952		6.25827	0.566138	0.585386	1.034	1.01097	4.50389e-16	0.585386		1.455		0.414488	0.00299131		0.0105006	0.0899538				0.519503				4.736	3.024	17.213	1.712	5.293	2.269	22.348	20.5028	66.933
	A3	14.257	19.554	17.707	36.796	12.772	28.931	20.299	42.687	20.811	43.154	20.595	42.967	20.86	43.221	43.221	1.043		5.53304	0.535362	0.553565	1.034	1.05276		0.553565		2.4525		0.420918	0.00303771		0.0176994	0.151623				0.54098				5.297	3.45	17.242	1.847	6.042	2.592	22.388	20.5394	67.076
	A4	12.505	25.372	20.958	66.774	12.8	52.069	26.42	70.55	27.443	72.101	27.179	71.771	27.823	72.35	72.35	2.562		5.42009	0.522181	0.539936	1.034	1.05009		0.539936		4.255		0.999015	0.00720977		0.0307078	0.263061				1.3055				12.867	8.453	41.402	4.414	13.915	5.462	44.13	40.4862	133.777
	A5	12.677	25.71	21.206	67.086	12.62	52.011	26.841	71.056	27.732	72.455	27.4	71.979	28.256	72.757	72.757	2.54		5.37929	0.528081	0.546035	1.034	1.06871		0.546035		6.806		1.00593	0.00725967		0.0491181	0.420774				1.29567				13.033	8.529	41.376	4.504	14.164	5.635	44.215	40.5642	133.803
	A6	12.443	25.226	20.762	66.631	12.499	52.305	26.237	70.379	27.188	71.779	27.112	71.691	27.521	71.956	71.956	2.492		5.51376	0.536603	0.554847	1.034	1.06247		0.554847		9.322		1.00888	0.00728096		0.0672757	0.576323				1.29231				12.783	8.319	41.405	4.464	13.794	5.475	44.142	40.4972	133.605
	A7	12.545	25.538	20.966	66.933	12.637	52.554	26.578	70.821	27.514	72.081	26.999	71.636	27.567	72.027	72.027	2.654		5.45862	0.542928	0.561388	1.034	1.00985		0.561388		11.895		1.09182	0.00787956		0.0858448	0.735396				1.32282				12.993	8.421	41.395	4.572	14.033	5.612	44.243	40.5899	133.664
	A8	12.804	26.12	21.426	67.528	12.609	52.594	27.106	71.39	28.009	72.514	27.604	72.185	28.131	72.718	72.718	2.588		5.34702	0.544421	0.562932	1.034	1.06032		0.562932		14.516		1.06867	0.00771244		0.10476	0.897436				1.33674				13.316	8.622	41.408	4.694	14.302	5.68	44.284	40.6275	133.673
	A9	12.843	25.646	21.073	67.053	12.49	52.444	26.446	70.715	27.406	71.914	27.091	71.589	27.709	72.141	72.141	2.622		5.58688	0.55565	0.574542	1.034	0.99899		0.574542		17.121		1.11315	0.00803346		0.12356	1.05849				1.35512				12.803	8.23	41.407	4.573	13.603	5.373	44.269	40.6138	133.438
	A10	14.042	19.303	17.419	36.623	12.692	29.089	19.87	42.238	20.467	42.772	20.343	72.711	20.525	42.708	42.708	1.046		5.6867	0.557892	0.57686	1.034	1.02753		0.57686		18.955		0.446495	0.0032223		0.136796	1.17187				0.51881				5.261	3.377	17.32	1.884	5.828	2.451	22.368	20.5211	96.856
	A11	14.098	19.054	17.309	36.33	12.625	28.852	19.731	42.12	20.196	42.676	19.893	42.228	20.305	42.56	42.56	0.994		5.9237	0.543444	0.561922	1.034	1.02813		0.561922		19.975		0.40945	0.00295495		0.144157	1.23493				0.469411				4.956	3.211	17.276	1.745	5.633	2.422	22.389	20.5404	67.07
	A12	14.072	19.299	17.419	36.56	12.783	29.104	20.04	42.414	20.553	42.918	20.106	42.419	20.578	42.901	42.901	1.044		5.71885	0.561697	0.580795	1.034	1.02035		0.580795		20.994		0.44975	0.00324579		0.151511	1.29793				0.478792				5.227	3.347	17.261	1.88	5.968	2.621	22.374	20.5266	67.001
	A13	14.157	19.2	17.39	36.422	12.433	28.766	19.923	42.284	20.316	42.668	20.061	42.392	20.327	42.655	42.655	1.014		5.88679	0.559852	0.578886	1.034	1.01476		0.578886		22.023		0.434891	0.00313855		0.158937	1.36155				0.383463				5.043	3.233	17.222	1.81	5.766	2.533	22.361	20.5147	67.011
	A14	14.097	18.805	17.176	36.073	12.645	28.917	19.55	41.91	19.962	42.308	19.624	41.959	20.063	42.437	42.437	0.956		6.13738	0.529068	0.547056	1.034	1.02505		0.547056		23.008		0.379586	0.00273942		0.166046	1.42245				0.321525				4.708	3.079	17.268	1.629	5.453	2.374	22.36	20.5138	67.055
	A15	14.222	19.196	17.428	36.478	12.604	28.897	19.898	42.269	20.37	42.682	19.997	42.307	20.375	42.605	42.605	1.002		5.94198	0.551466	0.570216	1.034	1.01833		0.570216		23.987		0.421056	0.00303871		0.173111	1.48297				0.298899				4.974	3.206	17.282	1.768	5.676	2.47	22.371	20.5239	66.852
	A16	14.005	19.232	17.433	36.455	12.508	28.795	19.896	42.297	20.45	42.798	20.132	42.441	20.583	42.855	42.855	1.04		5.54901	0.524796	0.542639	1.034	1.04906		0.542639		25.008		0.408344	0.00294697		0.18048	1.54609				0.191188				5.227	3.428	17.223	1.799	5.891	2.463	22.401	20.5514	66.929
	A17	14.052	19.271	17.411	36.547	12.57	28.873	19.887	42.266	20.509	42.807	20.24	42.543	20.56	42.867	42.867	1.038		5.69693	0.553736	0.572563	1.034	1.02993		0.572563		26.047		0.438621	0.00316547		0.187978	1.61033				0.132323				5.219	3.359	17.276	1.86	5.835	2.476	22.379	20.5312	66.908
	A18	14.209	19.194	17.489	36.489	12.826	29.089	20.021	42.417	20.403	42.705	20.179	42.505	20.527	42.806	42.806	0.992		5.79268	0.519817	0.537491	1.034	1.05234		0.537491		27.062		0.384391	0.0027741		0.195303	1.67308				0.0488818				4.985	3.28	17.295	1.705	5.812	2.532	22.396	20.5468	66.907
	A19	14.101	18.844	17.184	36.124	12.803	29.232	19.53	41.888	20.09	42.436	19.708	42.007	20.049	42.275	42.275	0.97		6.14337	0.538437	0.556743	1.034	1.01157		0.556743		28.043		0.394541	0.00284736		0.202383	1.73373				0.0228388				4.743	3.083	17.28	1.66	5.429	2.346	22.358	20.5119	66.871
	A20	14.09	19.271	17.513	36.543	12.591	28.945	20.153	42.572	20.574	42.87	20.263	42.545	20.679	42.926	42.926	1.038		5.55945	0.513585	0.531046	1.034	1.04955		0.531046		29.047		0.395526	0.00285446		0.209629	1.7958				0.018329				5.181	3.423	17.272	1.758	6.063	2.64	22.419	20.5679	66.825
	A21	14.254	18.85	17.273	36.109	12.812	29.06	19.66	42.068	20.067	42.356	19.883	42.172	19.936	42.223	42.223	0.934		6.23915	0.522358	0.540119	1.034	1.02875		0.540119		30.033		0.364371	0.00262962		0.216745	1.85676				0.0182246				4.596	3.019	17.259	1.577	5.406	2.387	22.408	20.5578	66.865
	A22	14.181	17.994	16.726	35.228	12.713	28.897	18.797	41.134	19.097	41.44	18.962	41.222	19.126	41.382	41.382	0.78		7.26994	0.498232	0.515172	1.034	1.03845		0.515172		30.89		0.284834	0.00205561		0.222929	1.90974				0.0140386				3.813	2.545	17.234	1.268	4.616	2.071	22.337	20.4927	66.859
	A23	14.269	17.61	16.464	34.83	12.755	29.12	18.305	40.679	18.638	41.062	18.432	40.754	18.58	40.765	40.765	0.708		8.3672	0.522096	0.539847	1.034	0.986723		0.539847		31.634		0.276012	0.00199194		0.228299	1.95574				0.0131299				3.341	2.195	17.22	1.146	4.036	1.841	22.374	20.5266	66.931
	A24	14.108	18.2	16.871	35.489	12.681	28.815	19.144	41.531	19.506	41.767	19.242	41.48	19.451	41.661	41.661	0.84		6.73833	0.480999	0.497353	1.034	1.04688		0.497353		32.408		0.291776	0.00210571		0.233885	2.00359				0.0138337				4.092	2.763	17.289	1.329	5.036	2.273	22.387	20.5385	66.709
	A25	14.103	16.789	15.88	34.045	12.71	29.139	17.49	39.875	17.77	40.066	17.578	39.868	17.884	40.053	40.053	0.57		10.2223	0.511536	0.528929	1.034	0.992216		0.528929		33.113		0.215989	0.00155877		0.238972	2.04718				0.0100634				2.686	1.777	17.256	0.909	3.387	1.61	22.385	20.5367	66.755
	A26	14.284	19.14	17.561	36.352	12.511	28.479	20.068	42.453	20.592	42.948	20.238	42.533	20.724	42.997	42.997	0.997		5.73421	0.481843	0.498226	1.034	1.0461		0.498226		33.8965		0.347181	0.00250556		0.244627	2.09562				0.0163219				4.856	3.277	17.212	1.579	5.784	2.507	22.385	20.5367	66.924
	A27	12.121	17.16	15.511	34.379	12.74	28.677	18.227	40.589	18.649	40.988	18.28	40.569	18.624	40.891	40.891	1.046		5.56578	0.486431	0.502969	1.034	1.03148		0.502969		34.918		0.369206	0.00266451		0.251999	2.15877				0.0176998				5.039	3.39	17.219	1.649	6.106	2.716	22.362	20.5156	66.895
	A28	14.225	19.178	17.616	36.394	12.596	28.5	20.177	42.548	20.666	43.007	20.391	42.722	20.82	43.036	43.036	1.02		5.5376	0.460631	0.476293	1.034	1.05809		0.476293		35.951		0.332818	0.00240191		0.259454	2.22263				0.016841				4.953	3.391	17.216	1.562	5.952	2.561	22.371	20.5239	66.888
	A29	14.175	18.906	17.42	36.12	12.578	28.546	19.907	42.286	20.445	42.721	20.217	42.383	20.575	42.587	42.587	0.986		5.76271	0.457935	0.473505	1.034	1.04745		0.473505		36.954		0.318976	0.00230201		0.266693	2.28464				0.0150224				4.731	3.245	17.214	1.486	5.732	2.487	22.379	20.5312	66.454
	A30	13.898	18.443	17.042	35.613	12.579	28.41	19.5	41.853	20.017	42.26	19.662	42.111	20.129	42.284	42.284	0.974		5.90681	0.445611	0.460761	1.034	1.02735		0.460761		37.934		0.302682	0.00218442		0.273765	2.34523				0.0145616				4.545	3.144	17.17	1.401	5.602	2.458	22.353	20.5073	66.847
	A31	13.054	17.737	16.3	34.904	12.614	28.547	18.81	41.206	19.263	41.591	19.387	41.651	18.967	41.191	41.191	1.008		5.73136	0.442699	0.45775	1.034	1.0249		0.45775		38.925		0.310212	0.00223877		0.280917	2.4065				0.0144431				4.683	3.246	17.167	1.437	5.756	2.51	22.396	20.5468	66.816
	A32	12.628	17.207	15.857	34.418	12.472	28.29	18.337	40.745	18.764	41.111	18.65	40.937	18.527	40.699	40.699	0.996		5.74822	0.418086	0.432301	1.034	1.03182		0.432301		39.927		0.281172	0.00202918		0.288148	2.46844				0.0135792				4.579	3.229	17.211	1.35	5.709	2.48	22.408	20.5578	66.806
	A33	14.035	19.678	18.14	36.85	12.703	27.958	21.195	43.625	21.596	43.815	21.66	43.957	21.529	43.804	43.804	1.26		4.55786	0.374665	0.387404	1.034	1.0369		0.387404		41.055		0.299129	0.00215877		0.296289	2.53818				0.0148049				5.643	4.105	17.172	1.538	7.16	3.055	22.43	20.578	66.791
	A34	12.872	17.62	16.939	34.856	12.517	27.271	19.898	42.279	20.396	42.687	20.31	42.57	20.094	42.316	42.316	1.276		4.40546	0.167445	0.173138	1.034	1.01442		0.173138		42.323		0.0295246	0.000213076		0.30544	2.61657				0.00265482				4.748	4.067	17.236	0.681	7.026	2.959	22.381	20.533	66.773
	A35	12.69	21.976	20.745	63.362	12.57	49.146	26.119	70.269	27.072	71.545	27.05	49.338	27.021	71.462	71.462	2.508		5.29075	0.152824	0.15802	1.034	1.02219		0.15802		44.215		0.0201151	0.000145168		0.319094	2.73355				-0.000639529				9.286	8.055	41.386	1.231	13.429	5.374	44.15	40.5046	111.202
	A36	12.746	22.14	20.921	63.541	12.805	49.2	26.542	70.754	27.383	71.949	27.361	49.62	27.127	71.481	71.481	2.608		5.21346	0.149113	0.154183	1.034	0.99764		0.154183		46.773		0.0109093	7.87308e-05		0.337555	2.89169				-0.000914069				9.394	8.175	41.401	1.219	13.796	5.621	44.212	40.5615	111.179
																																			13.0371	2.29718		12.7374
																																			0.242486			0.212495
																												13.3817			12.3874
																												12.2119			11.5177
																												13.2085			12.8876
																												12.8656			12.5871
																												12.9169	0.516631		12.345	0.588564
[truncated: 51 more columns]

## Sheet: Immiscible
Time (min)	section	tube mass	tube + soil	vol flask	vol flask + soln		vol flask + dil soln	new tube fot eth wash	Remain soil from transfer + orig tube	Oven dry	Tube after TFE decant	tube + soil +dillute	water ex tube	water ex + tube	Remain after water ex	remain after eth 2 wash	soil + kcl 1	KCl 1 remain	soil + kcl 2	KCl 2 remain	soil + kcl 3	KCl 3 remain	soil + kcl 4	KCl 4 remain	Sec Length (cm)		TetaG diluted (g/g)	TetaG (g/g)	TetaV [cc/cc]	Rho [g/cc]	Rho [g/cc]	Average Rho [g/cc]	Normalised Teta V (cc/cc)	mid-x [cm]		New section water (cc/cm2))	Sorptivity (cc/cm2/t1/2)	Sorptivity sum (cc/cm2/t1/2)	X [cm/sec1/2]	X/S (avg S)				Soil N sorptivity Total N [cm/sec1/2]	Conc of Applied Solution	Solute Front [cm/sec1/2]		mass soil at sampling (g)	Mass oven dry soil (g)
80	X1	16.045	21.387	14.076	15.14	1.064	24.102			19.403						21.987	44.327	22.317	44.543	22.353	44.387	22.231	44.281	22.389	0.979			0.590828	0.609734	1.032	1.09167	1.032	0.609734	0.4895		0.445185	0.00642569	0.121415	0.00706532	0.0581916		13.3817	7.42989	1.04276	12.3874			5.342	3.358
	X2	16.228	20.952	15.107	16.025	0.918	25.067			19.237						21.757	44.132	21.992	44.443	22.111	44.581	22.006	44.25	22.129	0.952			0.569957	0.588195	1.032	1.00596	0	0.588195	1.455		0.412402	0.00595251		0.0210011	0.17297				0.957292				4.724	3.009
	X3	15.951	21.196	16.347	17.298	0.951	26.338			19.392						22.137	44.474	22.357	44.81	22.394	44.924	22.346	44.63	22.426	1.043			0.524266	0.541043	1.032	1.05001		0.541043	2.4525		0.402643	0.00581164		0.0353988	0.291552				0.971532				5.245	3.441
	X4	15.93	28.682	14.517	16.7	2.183	24.53	12.963	16.004	20.888						26.636	71.161	26.784	71.542	27.612	72.434	26.993	71.698	27.586	2.562			0.594199	0.613214	1.032	0.993689		0.613214	4.255		1.17394	0.0169444		0.0614156	0.505833				2.68169				12.752	7.999
	X5	15.901	21.178	13.507	14.485	0.978	23.54			19.356						22.07	47.682	22.242	44.651	22.569	45.04	22.493	44.797	22.373	1.046			0.527352	0.544227	1.032	1.05126		0.544227	6.059		0.407131	0.00587643		0.0874541	0.720292				0.952504				5.277	3.455
	X6	16.18	21.131	13.988	14.902	0.914	24.023			19.408						21.963	44.237	22.228	44.665	22.482	44.92	22.323	44.663	22.488	0.994			0.533767	0.550848	1.032	1.03357		0.550848	7.079		0.393472	0.00567929		0.102177	0.841549				0.905417				4.951	3.228
	X7	15.931	21.203	13.444	14.424	0.98	23.434			19.397						22.024	44.355	22.376	44.777	22.727	45.202	22.402	44.721	22.486	1.044			0.521062	0.537736	1.032	1.05663		0.537736	8.098		0.399576	0.00576738		0.116885	0.962687				0.9162				5.272	3.466
	X8	15.95	21.044	15.835	16.74	0.905	25.781			19.32						21.957	44.241	22.51	44.946	22.592	45.029	22.103	44.46	22.441	1.014			0.511573	0.527943	1.032	1.05776		0.527943	9.127		0.378164	0.00545833		0.131737	1.08501				0.842578				5.094	3.37
	X9	16.127	20.821	14.931	15.753	0.822	24.946			19.199						21.632	44.023	21.967	44.424	22.154	44.593	22.094	44.438	22.18	0.956			0.527995	0.544891	1.032	1.02272		0.544891	10.112		0.372735	0.00537997		0.145954	1.20211				0.780464				4.694	3.072
	X10	16.169	21.22	15.048	15.983	0.935	25.036			19.465						22.062	44.394	22.421	44.819	22.591	45.063	22.581	44.941	22.633	1.002			0.532464	0.549502	1.032	1.04692		0.549502	11.091		0.395291	0.00570554		0.160085	1.31849				0.735656				5.051	3.296
	X11	16.055	21.244	13.63	14.54	0.91	23.681			19.487						22.117	44.49	22.514	44.933	22.741	45.175	22.668	44.99	22.728	1.04			0.511946	0.528329	1.032	1.05029		0.528329	12.112		0.388262	0.00560408		0.174822	1.43987				0.621852				5.189	3.432
	X12	16.157	21.348	15.744	16.681	0.937	25.751			19.575						22.194	44.531	22.597	45.102	22.641	45.071	22.784	45.14	22.796	1.038			0.518724	0.535324	1.032	1.04802		0.535324	13.151		0.394776	0.0056981		0.189818	1.56339				0.427297				5.191	3.418
	X13	16.233	21.261	14.216	15.089	0.873	24.298			19.586						22.087	44.378	22.538	44.922	22.686	45.165	22.716	45.06	22.704	0.992			0.499553	0.515538	1.032	1.07576		0.515538	14.166		0.357654	0.00516229		0.204469	1.68405				0.292636				5.028	3.353
	X14	16.091	20.805	13.325	14.159	0.834	23.339			19.316						21.684	44.025	22.291	44.641	22.174	44.591	22.203	44.665	72.22	0.98			0.461705	0.47648	1.032	1.04736		0.47648	15.152		0.31505	0.00454736		0.2187	1.80126				0.106031				4.714	3.225
	X15	16.007	21.154	15.374	16.267	0.893	25.348			19.458						22.102	44.498	22.555	44.94	22.681	45.097	22.678	45.08	22.695	1.038			0.491452	0.507178	1.032	1.05814		0.507178	16.161		0.365561	0.00527642		0.233264	1.92121				0.0564617				5.147	3.451
	X16	15.989	20.56	15.124	15.861	0.737	25.14			19.081						21.545	43.759	21.875	44.258	22.056	44.447	22.018	44.489	22.1	0.934			0.478331	0.493638	1.032	1.05363		0.493638	17.147		0.316288	0.00456522		0.247496	2.03843				0.0186156				4.571	3.092
	X17	16.131	20.93	15.604	16.338	0.734	25.63			19.397						22.007	44.329	22.34	44.817	22.512	44.91	22.535	44.954	22.608	0.997			0.469382	0.484402	1.032	1.04259		0.484402	18.1125		0.328414	0.00474024		0.261431	2.15321				0.0170871				4.799	3.266
	X18	16.239	21.238	14.615	15.355	0.74	24.628			19.69						22.345	44.717	22.805	45.146	23.053	45.476	22.925	45.41	23.078	1.046			0.448566	0.46292	1.032	1.05004		0.46292	19.134		0.322084	0.00464888		0.276176	2.27464				0.0141228				4.999	3.451
	X19	15.963	20.697	15.728	16.361	0.633	25.755			19.274						21.795	44.127	22.445	44.955	22.463	44.912	22.428	44.84	22.756	1.02			0.42978	0.443532	1.032	1.03312		0.443532	20.167		0.294303	0.0042479		0.291086	2.39745				0.0108696				4.734	3.311
	X20	16.933	20.54	15.127	15.668	0.541	25.129			19.192						21.786	44.138	22.114	44.52	22.29	44.732	22.172	44.68	22.291	0.986			0.596724	0.615819	1.032	0.729177		0.615819	21.17		0.454368	0.00655824		0.305563	2.51668				0.0358584				3.607	2.259
	X21	16.041	20.092	14.067	14.211	0.144	24.11			19.146						21.472	43.708	22.043	44.497	22.083	44.488	22.012	44.356	22.183	0.974			0.30467	0.314419	1.032	1.0146		0.314419	22.15		0.155274	0.00224119		0.319708	2.63318				0.000492093				4.051	3.105
	X22	16.006	19.758							19.28		37.177	12.802	27.99	21.986		44.355	22.336	44.719	22.366	44.833	22.357	44.749	22.401	1.008		5.4664	0.145999	0.150671	1.032	1.03374		0.150671	23.141		-0.00436389	-6.29874e-05		0.334012	2.75099				-0.0487937				3.752	3.274
	X23	15.903	19.662							19.186		37.066	14.078	29.279	21.86		44.282	22.212	44.663	22.233	44.71	22.122	44.588	22.204	0.996		5.44624	0.144989	0.149629	1.032	1.04907		0.149629	24.143		-0.00534952	-7.72136e-05		0.348474	2.87011				-0.0482128				3.759	3.283
	X24	16.003	20.732							20.131		38.207	14.291	28.937	23.578		45.978	23.848	46.304	23.91	46.332	23.935	46.267	23.889	1.26		4.37888	0.145591	0.15025	1.032	1.04271		0.15025	25.271		-0.005985	-8.6386e-05		0.364755	3.00421				-0.0609921				4.729	4.128
	X25	15.86	20.588							19.989		37.972	12.594	27.193	23.389		45.75	23.714	46.129	23.726	46.175	23.738	46.059	23.643	1.276		4.35529	0.145071	0.149714	1.032	1.02988		0.149714	26.539		-0.00674528	-9.73597e-05		0.383057	3.15495				-0.0617666				4.728	4.129
	X26	16.001	25.441							24.315		52.9	14.287	36.62	30.566		52.816	30.666	52.99	30.884	53.296	30.711	52.993	30.843	2.512		3.43818	0.135434	0.139768	1.032	1.05338		0.139768	28.433		-0.0382625	-0.000552272		0.410395	3.3801				-0.121597				9.44	8.314
Time (min)	section	tube mass	tube + soil	vol flask	vol flask + soln		vol flask + dil soln	new tube fot eth wash	Remain soil from transfer + orig tube	Oven dry	Tube after TFE decant	tube + soil +dillute	water ex tube	water ex + tube	Remain after water ex	remain after eth 2 wash	soil + kcl 1	KCl 1 remain	soil + kcl 2	KCl 2 remain	soil + kcl 3	KCl 3 remain	soil + kcl 4	KCl 4 remain	Sec Length (cm)		TetaG diluted (g/g)	TetaG (g/g)	TetaV [cc/cc]	Rho [g/cc]		Average Rho [g/cc]	Normalised Teta V (cc/cc)	mid-x [cm]		New section water (cc/cm2))	Sorptivity (cc/cm2/t1/2)	Sorptivity sum (cc/cm2/t1/2)	X [cm/sec1/2]	X/S (avg S)				Soil N sorptivity Total N [cm/sec1/2]	Conc of Applied Solution	Solute Front [cm/sec1/2]		mass soil at sampling (g)	Mass oven dry soil (g)
320	n1	16.35	21.697	13.277	14.392	1.115	23.301			19.789						22.288	44.518	22.753	45.137	22.933	45.309	23.042	45.327	22.915	0.979			0.554812	0.572566	1.032	1.118	1.032	0.572566	0.4895		0.408798	0.00295024	0.110801	0.00353266	0.0318828		12.2119	5.68424	0.484559	11.5177			5.347	3.439
	n2	16.151	21.009	13.93	14.841	0.911	23.92			19.333						21.719	44	22.13	44.546	22.328	44.711	22.431	44.771	22.322	0.952			0.526713	0.543568	1.032	1.06379	4.50389e-16	0.543568	1.455		0.369916	0.00266964		0.0105006	0.0947692				0.458485				4.858	3.182
	n3	15.94	21.128	14.706	15.663	0.957	24.719			19.342						21.83	44.167	22.347	44.724	22.552	45.007	22.59	44.901	22.55	1.043			0.524985	0.541785	1.032	1.03811		0.541785	2.4525		0.403417	0.00291141		0.0176994	0.15974				0.503542				5.188	3.402
	n4	16.022	28.885	15.747	18.108	2.361	25.794	14.11	16.091	22.517						28.172	72.658	28.842	73.498	29.041	73.858	28.88	73.438	29.487	2.562			0.517579	0.534142	1.032	1.05294		0.534142	4.255		0.971361	0.00701019		0.0307078	0.277143				1.21273				12.863	8.476
	n5	16.015	28.956	15.752	18.186	2.434	25.773	14.193	16.12	22.469						27.99	72.487	28.654	73.344	28.974	73.668	28.599	73.167	29.226	2.54			0.544088	0.561499	1.032	1.05016		0.561499	6.806		1.03251	0.00745147		0.0491181	0.443299				1.2751				12.941	8.381
	n6	15.932	28.588	14.3	16.689	2.389	24.297	14.096	16.039	22.193						27.683	72.094	28.31	73.088	28.732	73.502	28.183	72.862	28.556	2.492			0.542662	0.560027	1.032	1.04778		0.560027	9.322		1.00933	0.0072842		0.0672757	0.607174				1.23664				12.656	8.204
	n7	16.008	28.935	13.822	16.299	2.477	24.001	14.089	16.066	22.413						27.923	72.426	28.574	73.224	29.102	73.806	28.665	73.394	29.014	2.654			0.542233	0.559585	1.032	1.00517		0.559585	11.895		1.07377	0.00774925		0.0858448	0.774763				1.30735				12.927	8.382
	n8	15.997	29.193	15.261	17.787	2.526	25.292	14.196	16.162	22.602						28.145	72.664	28.889	73.595	29.111	73.941	28.817	73.293	29.278	2.588			0.53961	0.556878	1.032	1.05405		0.556878	14.516		1.04006	0.00750599		0.10476	0.945478				1.26477				13.196	8.571
	n9	16.159	28.982	15.549	17.918	2.369	25.581	14.046	16.301	22.215						27.568	72.131	28.295	73.005	29.056	73.915	29.167	72.83	28.666	2.622			0.542895	0.560268	1.032	1.00882		0.560268	17.121		1.06261	0.00766874		0.12356	1.11515				1.24703				12.823	8.311
	n10	16.096	21.383	14.323	15.328	1.005	24.305			19.528						21.873	44.133	22.412	44.79	22.748	45.087	22.76	45.016	22.678	1.046			0.540501	0.557797	1.032	1.04426		0.557797	18.955		0.421326	0.00304066		0.136796	1.23461				0.475767				5.287	3.432
	n11	15.97	20.956	15.059	16.04	0.981	25.131			19.203						21.375	43.744	21.933	44.292	22.155	44.575	22.341	44.637	22.118	0.994			0.542221	0.559572	1.032	1.03517		0.559572	19.975		0.402144	0.00290223		0.144157	1.30104				0.429175				4.986	3.233
	n12	16.027	21.292	16.476	17.451	0.975	26.516			19.449						21.855	44.161	22.358	44.724	22.78	45.212	22.776	45.053	22.656	1.044			0.538574	0.555808	1.032	1.04321		0.555808	20.994		0.418444	0.00301986		0.151511	1.36741				0.423873				5.265	3.422
	n13	16.324	21.389	13.981	14.897	0.916	24.016			19.643						21.877	44.224	22.354	44.733	22.725	45.125	22.846	45.16	22.757	1.014			0.526062	0.542896	1.032	1.04175		0.542896	22.023		0.393327	0.00283859		0.158937	1.43443				0.353902				5.065	3.319
	n14	16.073	20.818	16.305	17.177	0.872	26.318			19.159						21.288	43.627	21.803	44.245	22.141	44.48	22.102	44.432	22.169	0.956			0.537589	0.554792	1.032	1.02738		0.554792	23.008		0.382201	0.0027583		0.166046	1.49859				0.274792				4.745	3.086
	n15	16.157	21.08	14.787	15.718	0.931	24.803			19.358						21.553	44.092	22.333	44.725	22.397	44.787	22.444	44.794	22.402	1.002			0.537957	0.555172	1.032	1.01674		0.555172	23.987		0.400972	0.00289377		0.173111	1.56236				0.226302				4.923	3.201
	n16	16.221	21.347	14.76	15.657	0.897	24.829			19.588						21.859	44.2	22.667	44.949	22.871	45.227	22.827	45.141	22.777	1.04			0.522424	0.539141	1.032	1.03039		0.539141	25.008		0.399507	0.00288319		0.18048	1.62886				0.139203				5.126	3.367
	n17	16.238	21.43	16.314	17.229	0.915	26.337			19.649						21.923	44.216	22.671	44.96	22.89	45.253	22.96	45.317	22.797	1.038			0.522134	0.538843	1.032	1.04587		0.538843	26.047		0.398429	0.00287541		0.187978	1.69653				0.0838108				5.192	3.411
	n18	16.008	20.891	15.387	16.227	0.84	25.376			19.232						21.481	43.785	22.156	44.51	22.295	44.621	22.394	44.778	22.267	0.992			0.514578	0.531045	1.032	1.03437		0.531045	27.062		0.373036	0.00269216		0.195303	1.76264				0.0299533				4.883	3.224
	n19	16.26	20.952	15.065	15.89	0.825	25.049			19.366						21.576	43.921	22.228	44.634	22.315	44.753	22.425	44.785	22.269	0.97			0.510625	0.526965	1.032	1.01912		0.526965	28.043		0.360806	0.00260389		0.202383	1.82654				0.0159769				4.692	3.106
	n20	16.105	21.144	13.814	14.67	0.856	23.816			19.454						21.772	44.068	22.335	44.682	22.624	44.976	22.741	45.073	22.581	1.038			0.504628	0.520776	1.032	1.02686		0.520776	29.047		0.379676	0.00274007		0.209629	1.89193				0.00964201				5.039	3.349
	n21	15.988	20.534	14.187	14.945	0.758	24.206			19.027						21.098	43.487	21.79	44.109	21.897	44.343	21.951	44.321	21.93	0.934			0.495887	0.511755	1.032	1.03557		0.511755	30.033		0.333209	0.00240473		0.216745	1.95615				0.00890021				4.546	3.039
	n22	16.049	19.734	15.048	15.616	0.568	25.054			18.523						21.277	42.567	20.903	43.348	21.004	43.329	21.038	43.381	20.955	0.78			0.489491	0.505154	1.032	1.00948		0.505154	30.89		0.27312	0.00197108		0.222929	2.01197				0.00677281				3.685	2.474
	n23	15.979	19.363	14.332	14.913	0.581	24.361			18.208						19.802	42.217	20.392	42.731	20.496	42.836	20.691	43.11	20.453	0.708			0.51817	0.534751	1.032	1.00201		0.534751	31.634		0.268864	0.00194036		0.228299	2.06043				0.0042802				3.384	2.229
	n24	16.29	20.449	13.507	14.201	0.694	23.536			19.099						21.029	43.358	21.643	43.996	21.832	44.16	21.972	44.33	21.8	0.84			0.480598	0.495977	1.032	1.06431		0.495977	32.408		0.286421	0.00206706		0.233885	2.11085				0.00586966				4.159	2.809
	n25	16.139	18.682	14.555	14.963	0.408	24.54			17.844						19.159	41.497	19.664	42.029	19.662	42.066	19.824	42.201	19.672	0.57			0.491496	0.507223	1.032	0.952014		0.507223	33.113		0.200767	0.00144891		0.238972	2.15677				0.00237946				2.543	1.705
	n26	16.004	20.83	15.122	15.86	0.738	25.199			19.3						21.573	43.922	22.389	44.614	22.573	44.857	22.512	44.959	22.507	0.997			0.464199	0.479053	1.032	1.05217		0.479053	33.8965		0.323081	0.00233164		0.244627	2.2078				0.00676779				4.826	3.296
	n27	15.871	20.859	14.672	15.409	0.737	24.695			19.286						21.647	43.963	22.482	44.911	22.748	45.151	22.682	45.119	22.722	1.046			0.460615	0.475355	1.032	1.03909		0.475355	34.918		0.335091	0.00241831		0.251999	2.27433				0.00699428				4.988	3.415
	n28	16.031	20.889	14.631	15.389	0.758	24.716			19.366						21.688	44.021	22.517	44.899	22.648	44.968	22.894	45.291	22.669	1.02			0.456672	0.471285	1.032	1.04061		0.471285	35.951		0.322611	0.00232824		0.259454	2.34161				0.00553596				4.858	3.335
	n29	15.936	20.577	14.876	15.51	0.634	24.884			19.165						21.266	43.544	22.143	44.424	22.273	44.63	22.266	44.569	22.285	0.986			0.437287	0.45128	1.032	1.04228		0.45128	36.954		0.292132	0.00210828		0.266693	2.40694				0.00615315				4.641	3.229
	n30	15.992	20.53	15.787	16.377	0.59	25.762			19.147						21.264	43.628	22.103	44.384	22.197	44.622	22.28	44.606	22.222	0.974			0.438352	0.452379	1.032	1.03094		0.452379	37.934		0.289647	0.00209035		0.273765	2.47077				0.00434603				4.538	3.155
	n31	15.929	20.543	14.867	15.389	0.522	24.904			19.177						21.375	43.743	22.083	44.433	22.228	44.634	21.858	44.157	22.234	1.008			0.420567	0.434025	1.032	1.02553		0.434025	38.925		0.281257	0.0020298		0.280917	2.53532				0.00458922				4.614	3.248
	n32	15.965	20.331	14.512	14.941	0.429	24.557			19.111						21.26	43.611	22.005	44.34	22.107	44.479	21.811	44.134	22.107	0.996			0.387794	0.400203	1.032	1.00529		0.400203	39.927		0.244223	0.00176252		0.288148	2.60059				0.0025371				4.366	3.146
	n33	15.85	21.286	12.958	13.203	0.245	22.964			20.031						22.731	45.129	23.64	46.004	23.864	46.295	23.357	45.702	24.019	1.26			0.300167	0.309773	1.032	1.0561		0.309773	41.055		0.195014	0.00140739		0.296289	2.67406				-0.00352788				5.436	4.181
	n34	16.227	20.999	14.122						20.322	24.454	41.717	14.23	29.954	25.736		48.06	24.865	47.147	25.215	47.454	24.192	46.458	24.605	1.276		4.38095	0.165324	0.170614	1.032	1.0214		0.170614	42.323		0.0199234	0.000143784		0.30544	2.75664				-0.0308833				4.772	4.095
	n35	16.219	25.376	14.481				12.646		20.666	31.597	69.715	14.167	52.3	26.837		71.639	27.277	72.024	27.714	72.52	27.352	72.007	27.341	2.508		4.89464	0.141771	0.146307	1.032	1.01775		0.146307	44.215		-0.0218015	-0.000157339		0.319094	2.87988				-0.0607017				9.157	8.02
	n36	16.003	25.243	14.381				14.109		22.122	31.807	71.542	14.231	52.063	30.229		74.153	29.787	74.233	29.874	74.397	29.468	73.908	29.091	2.608		5.11194	0.153126	0.158026	1.032	0.977871		0.158026	46.773		0.00789235	5.69581e-05		0.337555	3.04649				-0.063122				9.24	8.013
																																										12.7968	6.55707		11.9526
																																										0.82715			0.614955
																																										11.973			12.5675
																																											0.93403
[truncated: 49 more columns]

## Sheet: PISTON FRONT
X	Cum X	Time(min)	ρ (kg L-1)	a	b	y0	x0	Theta 0 (calculated from equationfit in sigma plot)	Theta V (L L-1)	New Water (cm s-1)	Sorptivity		Avg PF	SD PF	θX		(θ+ρβ)X β=0.07	(θ+ρβ)X β=.11	Average β	Stdev β	piston font (cm)	Solute front (cm)	Difference (cm)	Proportion lag
		80 min
0.01	0.01	DILUTE	1.05336	0.4048	-0.0138	0.1432	0.304	0.548	0.548	0.004048	0.121035	0.00548	0.23	0.0105906	0.00548	0.123059	0.00621736	0.0066387	0.113333	0.0152753	15.5885	13.51	2.07846	13.3333						0.1													0.185
0.01	0.02		1.05336						0.548	0.004048		0.01096			0.01096	0.123059	0.0124347	0.0132774												0.13													0.175
0.01	0.03		1.05336						0.548	0.004048		0.01644			0.01644	0.123059	0.0186521	0.0199161												0.14													0.185
0.01	0.04		1.05336						0.548	0.004048		0.02192			0.02192	0.123059	0.0248694	0.0265548												0.15													0.17
0.01	0.05		1.05336						0.548	0.004048		0.0274			0.0274	0.123059	0.0310868	0.0331935												0.0216025													0.0075
0.01	0.06		1.05336						0.548	0.004048		0.03288			0.03288	0.123059	0.0373041	0.0398322
0.01	0.07		1.05336						0.548	0.004048		0.03836			0.03836	0.123059	0.0435215	0.0464709
0.01	0.08		1.05336						0.548	0.004048		0.04384			0.04384	0.123059	0.0497388	0.0531096
0.01	0.09		1.05336						0.548	0.004048		0.04932			0.04932	0.123059	0.0559562	0.0597483
0.01	0.1		1.05336						0.548	0.004048		0.0548			0.0548	0.123059	0.0621735	0.066387
0.01	0.11		1.05336						0.548	0.00404799		0.06028			0.06028	0.123059	0.0683909	0.0730257
0.01	0.12		1.05336						0.547999	0.00404799		0.06576			0.0657599	0.123059	0.0746082	0.0796643
0.01	0.13		1.05336						0.547999	0.00404798		0.07124			0.0712398	0.123059	0.0808254	0.0863029
0.01	0.14		1.05336						0.547997	0.00404797		0.0767199			0.0767196	0.123059	0.0870426	0.0929414
0.01	0.15		1.05336						0.547994	0.00404794		0.0821999			0.0821991	0.123058	0.0932595	0.0995796
0.01	0.16		1.05336						0.547988	0.00404788		0.0876798			0.0876781	0.123057	0.0994758	0.106217
0.01	0.17	Average	1.05336						0.547975	0.00404775		0.0931595			0.0931558	0.123055	0.105691	0.112854
0.01	0.18	0.185	1.05336						0.547949	0.00404749		0.098639			0.0986309	0.123051	0.111903	0.119487
0.01	0.19		1.05336						0.547895	0.00404695		0.104118			0.1041	0.123041	0.11811	0.126115
0.01	0.2		1.05336						0.547784	0.00404584		0.109596			0.109557	0.123019	0.124304	0.132731
0.01	0.21	Average	1.05336						0.547555	0.00404355		0.115071			0.114987	0.122972	0.130471	0.139319
0.01	0.22	0.225	1.05336						0.547082	0.00403882		0.120542			0.120358	0.12287	0.13658	0.14585
0.01	0.23		1.05336						0.54611	0.0040291		0.126003			0.125605	0.122652	0.142565	0.152255
0.01	0.24		1.05336						0.544119	0.00400919		0.131444			0.130589	0.122184	0.148285	0.158397
0.01	0.25		1.05336						0.540071	0.0039687		0.136845			0.135018	0.121192	0.153452	0.163985
0.01	0.26		1.05336						0.531968	0.00388768		0.142165			0.138312	0.119126	0.157483	0.168438
0.01	0.27		1.05336						0.516248	0.00373048		0.147327			0.139387	0.11496	0.159296	0.170672
0.01	0.28		1.05336						0.487513	0.00344313		0.152202			0.136504	0.107058	0.15715	0.168947
0.01	0.29		1.05336						0.440282	0.00297082		0.156605			0.127682	0.093597	0.149065	0.161284
0.01	0.3		1.05336						0.37473	0.00231529		0.160353			0.112419	0.074259	0.13454	0.14718
0.01	0.31		1.05336						0.30228	0.0015908		0.163375			0.0937069	0.0521619	0.116565	0.129627
0.01	0.32		1.05336						0.239855	0.000966549		0.165774			0.0767537	0.032498	0.100349	0.113832		0.11
0.01	0.33		1.05336						0.196603	0.000534023		0.16774			0.0648789	0.018441	0.0892116	0.103116		0.1
0.01	0.34		1.05336						0.170962	0.000277613		0.16945			0.0581269	0.00985119	0.083197	0.0975228		0.11
0.01	0.35		1.05336						0.157143	0.000139431		0.171021			0.0550002	0.00508394	0.0808076	0.0955547		0.11
0.01	0.36		1.05336						0.150078	6.87744e-05		0.172522			0.054028	0.00257561	0.0805728	0.0957412		0.1075
0.01	0.37		1.05336						0.146562	3.36142e-05		0.173987			0.0542278	0.00129227	0.08151	0.0970998		0.005
0.01	0.38		1.05336						0.144836	1.63547e-05		0.175436			0.0550376	0.000645036	0.0830571	0.0990682
0.01	0.39		1.05336						0.143994	7.93898e-06		0.176876			0.0561577	0.000321031	0.0849146	0.101347
0.01	0.4		1.05336						0.143585	3.84891e-06		0.178312			0.0574341	0.000159473	0.0869283	0.103782
0.01	0.41		1.05336						0.143387	1.8643e-06		0.179745			0.0587885	7.90964e-05	0.0890201	0.106295
0.01	0.42		1.05336						0.14329	9.02051e-07		0.181178			0.060182	3.91631e-05	0.0911509	0.108847
0.01	0.43		1.05336						0.143244	4.35678e-07		0.182611			0.0615949	1.93423e-05	0.0933011	0.111419
0.01	0.44		1.05336						0.143221	2.09681e-07		0.184043			0.0630173	9.51141e-06	0.095461	0.114
0.01	0.45		1.05336						0.14321	1.00177e-07		0.185475			0.0644446	4.63846e-06	0.0976256	0.116586
0.01	0.46		1.05336						0.143205	4.71198e-08		0.186907			0.0658743	2.22437e-06	0.0997926	0.119175
0.01	0.47		1.05336						0.143202	2.14132e-08		0.188339			0.0673051	1.02901e-06	0.101961	0.121764
0.01	0.48		1.05336						0.143201	8.95818e-09		0.189771			0.0687366	4.37395e-07	0.10413	0.124354
0.01	0.49		1.05336						0.143201	2.92371e-09		0.191203			0.0701683	1.44724e-07	0.106299	0.126945
0.01	0.5		1.05336						0.1432	0		0.192635			0.0716001	0	0.108468	0.129535
X	Cum X	Time(min)	ρ (g/ml)	a	b	y0	x0	Ci (calculated from equationfit in sigma plot)	Total N	Sorptivity					θX		(θ+ρβ)X β=0.07	(θ+ρβ)X β=0.10			piston font (cm)	Solute front (cm)	Difference (cm)	Proportion lag
		DILUTE
0.01	0.01	320	1.03359	0.407	-0.0141	0.15	0.2936		0.557	0.00407	0.11746	0.00557			0.00557	0.119495	0.00629351	0.00660359			31.1769	25.6344	5.54256	17.7778
0.01	0.02		1.03359						0.557	0.00407		0.01114			0.01114	0.119495	0.012587	0.0132072
0.01	0.03		1.03359						0.557	0.00407		0.01671			0.01671	0.119495	0.0188805	0.0198108
0.01	0.04		1.03359						0.557	0.00407		0.02228			0.02228	0.119495	0.0251741	0.0264144
0.01	0.05		1.03359						0.557	0.00407		0.02785			0.02785	0.119495	0.0314676	0.033018
0.01	0.06		1.03359						0.557	0.00407		0.03342			0.03342	0.119495	0.0377611	0.0396215
0.01	0.07		1.03359						0.557	0.00407		0.03899			0.03899	0.119495	0.0440546	0.0462251
0.01	0.08		1.03359						0.557	0.00407		0.04456			0.04456	0.119495	0.0503481	0.0528287
0.01	0.09		1.03359						0.557	0.00407		0.05013			0.05013	0.119495	0.0566416	0.0594323
0.01	0.1		1.03359						0.557	0.00406999		0.0557			0.0557	0.119495	0.0629351	0.0660359
0.01	0.11		1.03359						0.556999	0.00406999		0.06127			0.0612699	0.119495	0.0692286	0.0726394
0.01	0.12		1.03359						0.556998	0.00406998		0.06684			0.0668398	0.119495	0.0755219	0.0792429
0.01	0.13		1.03359						0.556996	0.00406996		0.0724099			0.0724095	0.119495	0.0818152	0.0858462
0.01	0.14		1.03359						0.556992	0.00406992		0.0779799			0.0779789	0.119494	0.0881081	0.0924492
0.01	0.15		1.03359						0.556985	0.00406984		0.0835497			0.0835477	0.119493	0.0944004	0.0990516
0.01	0.16		1.03359						0.556969	0.00406969		0.0891194			0.089115	0.119491	0.100691	0.105652
0.01	0.17	Average	1.03359						0.556937	0.00406936		0.0946888			0.0946792	0.119485	0.106979	0.11225
0.01	0.18	0.175	1.03359						0.556871	0.00406871		0.100257			0.100237	0.119474	0.11326	0.118841
0.01	0.19		1.03359						0.556738	0.00406738		0.105825			0.10578	0.119449	0.119527	0.125418
0.01	0.2	Average	1.03359						0.556468	0.00406468		0.11139			0.111294	0.119396	0.125764	0.131965
0.01	0.21	0.215	1.03359						0.55592	0.0040592		0.116949			0.116743	0.119284	0.131937	0.138449
0.01	0.22		1.03359						0.554811	0.00404811		0.122497			0.122058	0.119046	0.137976	0.144797
0.01	0.23		1.03359						0.552575	0.00402575		0.128023			0.127092	0.118543	0.143733	0.150865
0.01	0.24		1.03359						0.548107	0.00398106		0.133504			0.131546	0.117493	0.14891	0.156352
0.01	0.25		1.03359						0.539324	0.00389324		0.138897			0.134831	0.115341	0.152919	0.160671
0.01	0.26		1.03359						0.522617	0.00372617		0.144123			0.13588	0.11108	0.154692	0.162754
0.01	0.27		1.03359						0.492725	0.00342725		0.14905			0.133036	0.103159	0.152571	0.160943
0.01	0.28		1.03359						0.44468	0.0029468		0.153497			0.12451	0.0899468	0.144769	0.153451
0.01	0.29		1.03359						0.379339	0.00229338		0.15729			0.110008	0.0713245	0.13099	0.139982
0.01	0.3		1.03359						0.308093	0.00158092		0.160371			0.0924278	0.0503069	0.114133	0.123435
0.01	0.31		1.03359						0.246907	0.000969068		0.16284			0.0765412	0.0316453	0.0989701	0.108582
0.01	0.32		1.03359						0.204241	0.000542412		0.164883			0.0653572	0.0182057	0.0885097	0.0984322
0.01	0.33		1.03359						0.178626	0.00028626		0.166669			0.0589466	0.00988073	0.0828226	0.0930552
0.01	0.34		1.03359						0.164607	0.000146066		0.168315			0.0559663	0.00518422	0.0805658	0.0911084
0.01	0.35		1.03359						0.15732	7.32021e-05		0.169888			0.0550621	0.00267042	0.0803851	0.0912378
0.01	0.36		1.03359						0.153635	3.63487e-05		0.171425			0.0553086	0.00136212	0.0813551	0.0925179
0.01	0.37		1.03359						0.151797	1.79652e-05		0.172943			0.0561648	0.000691124	0.0829348	0.0944077
0.01	0.38		1.03359						0.150886	8.85832e-06		0.174452			0.0573367	0.000349617	0.0848302	0.0966132
0.01	0.39		1.03359						0.150436	4.36246e-06		0.175956			0.0586702	0.000176526	0.0868872	0.0989803
0.01	0.4		1.03359						0.150215	2.14671e-06		0.177458			0.0600859	8.90041e-05	0.0890265	0.10143
0.01	0.41		1.03359						0.150106	1.05562e-06		0.178959			0.0615434	4.48148e-05	0.0912074	0.103921
0.01	0.42		1.03359						0.150052	5.18555e-07		0.18046			0.0630219	2.25266e-05	0.0934094	0.106433
0.01	0.43		1.03359						0.150026	2.54252e-07		0.18196			0.064511	1.12937e-05	0.0956221	0.108955
0.01	0.44		1.03359						0.150013	1.24195e-07		0.18346			0.0660055	5.63625e-06	0.0978402	0.111484
0.01	0.45		1.03359						0.150006	6.02004e-08		0.18496			0.0675028	2.78849e-06	0.100061	0.114014
0.01	0.46		1.03359						0.150003	2.87125e-08		0.18646			0.0690014	1.35579e-06	0.102283	0.116547
0.01	0.47		1.03359						0.150002	1.32194e-08		0.18796			0.0705007	6.35361e-07	0.104506	0.119079
0.01	0.48		1.03359						0.150001	5.59627e-09		0.18946			0.0720004	2.73265e-07	0.106729	0.121613
0.01	0.49		1.03359						0.15	1.84549e-09		0.19096			0.0735002	9.13518e-08	0.108952	0.124146
0.01	0.5		1.03359						0.15	0		0.19246			0.0750001	0	0.111176	0.12668
X	Cum X	Time(min)	ρ (g/ml)	a	b	y0	x0	Ci (calculated from equationfit in sigma plot)	Total N	Sorptivity					θX		(θ+ρβ)X β=0.07	(θ+ρβ)X β=0.11			piston font (cm)	Solute front (cm)	Difference (cm)	Proportion lag
		IMMISCIBLE
0.01	0.01	80	1.0316	0.39	-0.015	0.15	0.3116		0.54	0.00389999	0.119573	0.0054			0.0054	0.121523	0.00612212	0.00653476			14.8956	12.1244	2.77128	18.6047
0.01	0.02		1.0316						0.54	0.00389999		0.0108			0.0108	0.121523	0.0122442	0.0130695
0.01	0.03		1.0316						0.54	0.00389999		0.0162			0.0162	0.121523	0.0183664	0.0196043
0.01	0.04		1.0316						0.54	0.00389999		0.0216			0.0216	0.121523	0.0244885	0.0261391
0.01	0.05		1.0316						0.54	0.00389999		0.027			0.027	0.121523	0.0306106	0.0326738
0.01	0.06		1.0316						0.54	0.00389999		0.0324			0.0324	0.121523	0.0367327	0.0392086
0.01	0.07		1.0316						0.54	0.00389999		0.0378			0.0378	0.121523	0.0428549	0.0457433
0.01	0.08		1.0316						0.54	0.00389999		0.0432			0.0432	0.121523	0.048977	0.0522781
0.01	0.09		1.0316						0.54	0.00389998		0.0486			0.0486	0.121523	0.0550991	0.0588129
0.01	0.1		1.0316						0.54	0.00389998		0.054			0.054	0.121523	0.0612212	0.0653476
0.01	0.11		1.0316						0.539999	0.00389998		0.0594			0.0593999	0.121523	0.0673433	0.0718823
0.01	0.12		1.0316						0.539999	0.00389998		0.0648			0.0647999	0.121523	0.0734653	0.078417
0.01	0.13		1.0316						0.539998	0.00389996		0.0702			0.0701997	0.121523	0.0795873	0.0849517
0.01	0.14		1.0316						0.539996	0.00389994		0.0755999			0.0755994	0.121523	0.0857091	0.0914861
0.01	0.15		1.0316						0.539992	0.0038999		0.0809998			0.0809988	0.121522	0.0918306	0.0980202
0.01	0.16		1.0316						0.539984	0.00389983		0.0863997			0.0863975	0.121521	0.0979514	0.104554
0.01	0.17	Average	1.0316						0.539969	0.00389968		0.0917994			0.0917947	0.121519	0.104071	0.111086
0.01	0.18	0.185	1.0316						0.53994	0.00389938		0.0971988			0.0971891	0.121513	0.110187	0.117615
0.01	0.19		1.0316						0.539882	0.00389881		0.102598			0.102578	0.121503	0.116298	0.124138
0.01	0.2		1.0316						0.539771	0.0038977		0.107995			0.107954	0.121481	0.122397	0.13065
0.01	0.21	Average	1.0316						0.539554	0.00389553		0.113391			0.113306	0.121437	0.128471	0.137136
0.01	0.22	0.235	1.0316						0.539133	0.00389132		0.118782			0.118609	0.121346	0.134496	0.143574
0.01	0.23		1.0316						0.538315	0.00388314		0.124165			0.123812	0.121162	0.140421	0.149912
0.01	0.24		1.0316						0.536731	0.0038673		0.129533			0.128816	0.12079	0.146146	0.15605
0.01	0.25		1.0316						0.533684	0.00383682		0.134869			0.133421	0.120043	0.151474	0.16179
0.01	0.26		1.0316						0.527883	0.00377882		0.140148			0.13725	0.118564	0.156025	0.166754
0.01	0.27		1.0316						0.517075	0.00367074		0.145319			0.13961	0.1157	0.159108	0.170249
0.01	0.28		1.0316						0.497704	0.00347703		0.150296			0.139357	0.110373	0.159577	0.171131
0.01	0.29		1.0316						0.465297	0.00315296		0.154949			0.134936	0.101137	0.155878	0.167844
0.01	0.3		1.0316						0.416854	0.00266853		0.159118			0.125056	0.0868462	0.14672	0.159099
0.01	0.31		1.0316						0.35539	0.00205389		0.162672			0.110171	0.0680997	0.132557	0.145349
0.01	0.32		1.0316						0.291784	0.00141782		0.165589			0.0933707	0.0480636	0.116479	0.129683
0.01	0.33		1.0316						0.238438	0.000884371		0.167974			0.0786847	0.0307265	0.102515	0.116132
0.01	0.34		1.0316						0.201037	0.000510359		0.169984			0.0683527	0.0181971	0.0929049	0.106935
0.01	0.35		1.0316						0.177985	0.000279841		0.171764			0.0622949	0.0102442	0.0875692	0.102012
0.01	0.36		1.0316						0.164888	0.000148867		0.173413			0.0593597	0.00559459	0.0853561	0.100211
0.01	0.37		1.0316						0.157788	7.78707e-05		0.174991			0.0583817	0.00300324	0.0851003	0.100368
0.01	0.38		1.0316						0.154038	4.03659e-05		0.176531			0.0585344	0.00159681	0.0859751	0.101655
0.01	0.39		1.0316						0.152084	2.08229e-05		0.178052			0.0593126	0.000844401	0.0874754	0.103568
0.01	0.4		1.0316						0.151073	1.0712e-05		0.179563			0.060429	0.000445024	0.0893139	0.10582
0.01	0.41		1.0316						0.150551	5.50046e-06		0.181068			0.0617261	0.000233955	0.0913331	0.108251
0.01	0.42		1.0316						0.150283	2.81932e-06		0.182571			0.063119	0.000122688	0.0934481	0.110779
0.01	0.43		1.0316						0.150146	1.44134e-06		0.184072			0.0645626	6.41237e-05	0.0956138	0.113357
0.01	0.44		1.0316						0.150075	7.33485e-07		0.185573			0.0660329	3.3332e-05	0.0978063	0.115963
0.01	0.45		1.0316						0.150038	3.69959e-07		0.187074			0.0675173	1.71551e-05	0.100013	0.118582
0.01	0.46		1.0316						0.15002	1.83293e-07		0.188574			0.0690091	8.66177e-06	0.102227	0.121208
0.01	0.47		1.0316						0.15001	8.7448e-08		0.190074			0.0705048	4.20499e-06	0.104445	0.123839
0.01	0.48		1.0316						0.150005	3.82378e-08		0.191574			0.0720025	1.86751e-06	0.106664	0.126471
0.01	0.49		1.0316						0.150003	1.2972e-08		0.193074			0.0735013	6.42115e-07	0.108885	0.129105
0.01	0.5		1.0316						0.150001	0		0.194574			0.0750007	0	0.111107	0.131739
X	Cum X	Time(min)	ρ (g/ml)	a	b	y0	x0	Ci (calculated from equationfit in sigma plot)	Total N	Sorptivity					θX		(θ+ρβ)X β=0.07	(θ+ρβ)X β=0.11			piston font (cm)	Solute front (cm)	Difference (cm)	Proportion lag
		IMMISCIBLE
0.01	0.01	320	1.0316	0.39	-0.02	0.15	0.29		0.54	0.00389989	0.111144	0.0054			0.0054	0.113094	0.00612212	0.00653476			29.7913	24.2487	5.54256	18.6047
0.01	0.02		1.0316						0.539999	0.00389989		0.0108			0.0108	0.113094	0.0122442	0.0130695
0.01	0.03		1.0316						0.539999	0.00389988		0.0162			0.0162	0.113094	0.0183663	0.0196043
0.01	0.04		1.0316						0.539999	0.00389988		0.0216			0.0215999	0.113094	0.0244884	0.026139
0.01	0.05		1.0316	0.4	-0.02	0.15	0.2905		0.539998	0.00389987		0.0269999			0.0269999	0.113094	0.0306105	0.0326737
0.01	0.06		1.0316						0.539996	0.00389985		0.0323999			0.0323998	0.113094	0.0367325	0.0392083
0.01	0.07		1.0316						0.539993	0.00389983		0.0377998			0.0377995	0.113094	0.0428544	0.0457429
0.01	0.08		1.0316						0.539989	0.00389979		0.0431997			0.0431991	0.113094	0.0489761	0.0522773
0.01	0.09		1.0316						0.539982	0.00389972		0.0485996			0.0485984	0.113093	0.0550975	0.0588113
0.01	0.1		1.0316						0.539971	0.0038996		0.0539993			0.0539971	0.113092	0.0612183	0.0653447
0.01	0.11		1.0316						0.539952	0.00389941		0.0593988			0.0593947	0.11309	0.0673381	0.0718771
0.01	0.12		1.0316						0.539921	0.0038991		0.064798			0.0647905	0.113087	0.073456	0.0784077
0.01	0.13		1.0316						0.539869	0.00389858		0.0701967			0.070183	0.11308	0.0795706	0.0849349
0.01	0.14		1.0316						0.539784	0.00389774		0.0755945			0.0755698	0.113069	0.0856795	0.0914565
0.01	0.15		1.0316						0.539645	0.00389634		0.080991			0.0809467	0.113048	0.0917785	0.0979682
0.01	0.16	Average	1.0316						0.539415	0.00389404		0.0863851			0.0863063	0.113013	0.0978603	0.104463
0.01	0.17	0.17	1.0316						0.539036	0.00389025		0.0917755			0.0916361	0.11295	0.103912	0.110927
0.01	0.18		1.0316						0.538413	0.00388402		0.0971596			0.0969143	0.112841	0.109912	0.11734
0.01	0.19		1.0316						0.53739	0.00387379		0.102533			0.102104	0.112652	0.115824	0.123665
0.01	0.2	Average	1.0316						0.535715	0.00385704		0.107891			0.107143	0.112325	0.121585	0.129838
0.01	0.21	0.23	1.0316						0.532985	0.00382975		0.113221			0.111927	0.111766	0.127092	0.135757
0.01	0.22		1.0316						0.528568	0.00378557		0.118506			0.116285	0.110816	0.132172	0.14125
0.01	0.23		1.0316						0.521504	0.00371493		0.123721			0.119946	0.109227	0.136555	0.146045
0.01	0.24		1.0316						0.510415	0.00360405		0.128825			0.1225	0.106621	0.139831	0.149734
0.01	0.25		1.0316						0.493511	0.003435		0.13376			0.123378	0.102479	0.141431	0.151747
0.01	0.26		1.0316						0.468854	0.00318843		0.138449			0.121902	0.0961917	0.140677	0.151406
0.01	0.27		1.0316						0.435113	0.00285102		0.1428			0.11748	0.0872503	0.136978	0.148119
0.01	0.28		1.0316						0.392759	0.00242748		0.146728			0.109973	0.075603	0.130192	0.141746
0.01	0.29		1.0316						0.345	0.00194989		0.150178			0.10005	0.0619917	0.120992	0.132958
0.01	0.3		1.0316						0.297241	0.0014723		0.15315			0.0891723	0.0479027	0.110836	0.123215
0.01	0.31		1.0316						0.254887	0.00104876		0.155699			0.079015	0.0349848	0.101401	0.114193
0.01	0.32		1.0316						0.221146	0.000711352		0.15791			0.0707667	0.0243564	0.0938746	0.107079
0.01	0.33		1.0316						0.196489	0.000464784		0.159875			0.0648414	0.0163429	0.0886715	0.102289
0.01	0.34		1.0316						0.179585	0.00029574		0.161671			0.0610588	0.0106799	0.085611	0.0996408
0.01	0.35		1.0316						0.168496	0.000184854		0.163356			0.0589736	0.00685434	0.0842479	0.0986904
0.01	0.36		1.0316						0.161432	0.00011421		0.164971			0.0581154	0.00434651	0.0841119	0.098967
0.01	0.37		1.0316						0.157015	7.00388e-05		0.166541			0.0580954	0.00273425	0.084814	0.100082
0.01	0.38		1.0316						0.154285	4.27417e-05		0.168083			0.0586283	0.00171061	0.0860689	0.101749
0.01	0.39		1.0316						0.15261	2.59947e-05		0.16961			0.059518	0.00106585	0.0876808	0.103774
0.01	0.4		1.0316						0.151587	1.57661e-05		0.171125			0.0606349	0.000661821	0.0895198	0.106026
0.01	0.41		1.0316						0.150964	9.53584e-06		0.172635			0.0618954	0.000409493	0.0915024	0.108421
0.01	0.42		1.0316						0.150585	5.74722e-06		0.174141			0.0632459	0.000252266	0.093575	0.110906
0.01	0.43		1.0316						0.150355	3.44571e-06		0.175645			0.0646528	0.000154451	0.0957041	0.113448
0.01	0.44		1.0316						0.150216	2.04845e-06		0.177147			0.0660949	9.36704e-05	0.0978683	0.116024
0.01	0.45		1.0316						0.150131	1.20048e-06		0.178648			0.0675589	5.59357e-05	0.100054	0.118623
0.01	0.46		1.0316						0.150079	6.85976e-07		0.180149			0.0690365	3.25259e-05	0.102254	0.121236
0.01	0.47		1.0316						0.150048	3.7385e-07		0.181649			0.0705226	1.8012e-05	0.104462	0.123857
0.01	0.48		1.0316						0.150029	1.84511e-07		0.18315			0.072014	9.01845e-06	0.106676	0.126483
0.01	0.49		1.0316						0.150018	6.96625e-08		0.18465			0.0735087	3.44829e-06	0.108893	0.129112
0.01	0.5		1.0316						0.150011	0		0.18615			0.0750054	0	0.111112	0.131744

## Sheet: SOLUTE FRONT Total N
X	Cum X	Time(min)	a	b	y0	x0	Ci (calculated from equationfit in sigma plot)	Total N	Integral Total N-Ci [cm/sec1/2] A	Area X x sec L	Area rectangle - solute integral	Total integral- sum of integral		avg front	SD		new N		S	Soln Conc
		DILUTE
0.01	0.01	80	924.998	-0.0145	50.1634	0.1826	975.159	975.156	9.24992	9.27209	0.0221652	156.092		0.1725	0		9.27206	165.386	0.126344	1309.02
0.01	0.02							975.149	18.4998	18.5442	0.0443925	146.842					9.27199
0.01	0.03							975.137	27.7717	27.8163	0.0446098	137.571					9.27187
0.01	0.04							975.112	37.0433	37.0883	0.0450739	128.299					9.27162
0.01	0.05							975.063	46.3144	46.3604	0.04603	119.028					9.27113
0.01	0.06							974.965	55.5846	55.6325	0.0479665	109.758					9.27015
0.01	0.07							974.77	64.8527	64.9046	0.0518565	100.489					9.2682
0.01	0.08							974.381	74.1171	74.1767	0.0596371	91.2252					9.26431
0.01	0.09							973.606	83.3736	83.4488	0.0751624	81.9686					9.25656
0.01	0.1							972.066	92.6148	92.7209	0.106084	72.7274					9.24116
0.01	0.11							969.013	101.825	101.993	0.167539	63.5168					9.21063
0.01	0.12							962.988	110.976	111.265	0.289247	54.3664					9.15038
0.01	0.13							951.212	120.008	120.537	0.528717	45.3338					9.03262
0.01	0.14							928.625	128.815	129.809	0.994053	36.5271					8.80675
0.01	0.15							886.826	137.204	139.081	1.87738	28.1383					8.38876
0.01	0.16	Average	stdev					814.356	144.868	148.353	3.48541	20.4742					7.66406
0.01	0.17	0.175	0.00707107					701.853	151.407	157.625	6.21847	13.9352					6.53903
0.01	0.18							554.017	156.468	166.898	10.4299	8.87453					5.06067
0.01	0.19							397.142	159.96	176.17	16.21	5.38261					3.49192
0.01	0.2							264.278	162.123	185.442	23.3189	3.21933					2.16328
0.01	0.21							171.601	163.359	194.714	31.3544	1.98283					1.23651
0.01	0.22							115.359	164.033	203.986	39.9524	1.30874					0.67409
0.01	0.23							84.0658	164.395	213.258	48.8634	0.947579					0.361158
0.01	0.24							67.4903	164.59	222.53	57.94	0.752176					0.195403
0.01	0.25							58.9391	164.7	231.802	67.1022	0.642285					0.109891
0.01	0.26							54.5875	164.766	241.074	76.308	0.57591					0.066375
0.01	0.27							52.3885	164.811	250.346	85.5357	0.531525					0.0443849
0.01	0.28							51.2812	164.844	259.618	94.7744	0.498213					0.0333118
0.01	0.29							50.7246	164.872	268.891	104.019	0.470467					0.0277458
0.01	0.3							50.4451	164.897	278.163	113.266	0.445517					0.0249506
0.01	0.31							50.3047	164.92	287.435	122.514	0.421969					0.0235474
0.01	0.32							50.2343	164.943	296.707	131.764	0.399126					0.0228432
0.01	0.33							50.199	164.966	305.979	141.013	0.376636					0.0224899
0.01	0.34							50.1813	164.988	315.251	150.263	0.354324					0.0223126
0.01	0.35							50.1724	165.01	324.523	159.513	0.3321					0.0222236
0.01	0.36							50.1679	165.032	333.795	168.763	0.309921					0.022179
0.01	0.37							50.1657	165.054	343.067	178.013	0.287765					0.0221566
0.01	0.38							50.1645	165.077	352.339	187.263	0.265619					0.0221453
0.01	0.39							50.164	165.099	361.611	196.513	0.24348					0.0221397
0.01	0.4							50.1637	165.121	370.883	205.763	0.221343					0.0221368
0.01	0.41							50.1635	165.143	380.156	215.013	0.199207					0.0221354
0.01	0.42							50.1635	165.165	389.428	224.262	0.177073					0.0221347
0.01	0.43							50.1634	165.187	398.7	233.512	0.154938					0.0221344
0.01	0.44							50.1634	165.209	407.972	242.762	0.132804					0.0221342
0.01	0.45							50.1634	165.232	417.244	252.012	0.11067					0.0221341
0.01	0.46							50.1634	165.254	426.516	261.262	0.088536					0.022134
0.01	0.47							50.1634	165.276	435.788	270.512	0.066402					0.022134
0.01	0.48							50.1634	165.298	445.06	279.762	0.044268					0.022134
0.01	0.49							50.1634	165.32	454.332	289.012	0.022134					0.022134
0.01	0.5							50.1634	165.342	463.604	298.262	0					0.022134
X	Cum X	Time(min)	a	b	y0	x0	Ci (calculated from equationfit in sigma plot)	Total N	Integral Total N-Ci [cm/sec1/2] A	Area X x sec L	Area rectangle - solute integral	Total integral- sum of integral					new N
		DILUTE
0.01	0.01	320	962.09	-0.0114	60.3693	0.1731	1022.46	1022.46	9.74509	9.74509	3.43722e-06	158.192					9.74509	167.937	0.126345	1329.2
0.01	0.02							1022.46	19.4902	19.4902	1.5138e-05	148.447					9.74508
0.01	0.03							1022.46	29.2352	29.2353	4.67055e-05	138.702					9.74506
0.01	0.04							1022.45	38.9802	38.9804	0.000126035	128.957					9.74501
0.01	0.05							1022.44	48.7251	48.7254	0.000320189	119.212					9.7449
0.01	0.06							1022.41	58.4697	58.4705	0.000790387	109.467					9.74462
0.01	0.07							1022.35	68.2137	68.2156	0.00192417	99.7233					9.74396
0.01	0.08							1022.19	77.9561	77.9607	0.00465292	89.9809					9.74236
0.01	0.09							1021.8	87.6946	87.7058	0.0112141	80.2424					9.73853
0.01	0.1							1020.88	97.4239	97.4509	0.0269763	70.513					9.72933
0.01	0.11							1018.68	107.131	107.196	0.0647874	60.8058					9.70728
0.01	0.12							1013.42	116.786	116.941	0.155195	51.1511					9.65468
0.01	0.13							1001.01	126.316	126.686	0.369721	41.6205					9.53056
0.01	0.14							972.449	135.561	136.431	0.869816	32.3755					9.24499
0.01	0.15							910.407	144.186	146.176	1.99034	23.751					8.62457
0.01	0.16	Average	stdev					790.933	151.616	155.921	4.3056	16.3211					7.42983
0.01	0.17	0.175	0.00707107					606.419	157.201	165.667	8.46599	10.7364					5.58469
0.01	0.18							400.122	160.722	175.412	14.6894	7.21471					3.52172
0.01	0.19							238.411	162.627	185.157	22.5298	5.31011					1.90461
0.01	0.2							143.399	163.581	194.902	31.3204	4.35561					0.954494
0.01	0.21							96.7388	164.069	204.647	40.5776	3.86773					0.487888
0.01	0.22							75.8387	164.348	214.392	50.0438	3.58884					0.278887
0.01	0.23							66.8648	164.537	224.137	59.5998	3.39969					0.189148
0.01	0.24							63.0818	164.689	233.882	69.1936	3.24837					0.151318
0.01	0.25							61.4994	164.824	243.627	78.8032	3.11288					0.135494
0.01	0.26							60.8397	164.953	253.372	88.4193	2.98398					0.128897
0.01	0.27							60.565	165.079	263.117	98.0383	2.85783					0.12615
0.01	0.28							60.4507	165.204	272.863	107.658	2.73283					0.125007
0.01	0.29							60.4032	165.329	282.608	117.279	2.60829					0.124532
0.01	0.3							60.3834	165.453	292.353	126.9	2.48396					0.124334
0.01	0.31							60.3752	165.577	302.098	136.521	2.35971					0.124252
0.01	0.32							60.3717	165.701	311.843	146.141	2.23549					0.124217
0.01	0.33							60.3703	165.826	321.588	155.762	2.11129					0.124203
0.01	0.34							60.3697	165.95	331.333	165.383	1.98709					0.124197
0.01	0.35							60.3695	166.074	341.078	175.004	1.8629					0.124195
0.01	0.36							60.3694	166.198	350.823	184.625	1.7387					0.124194
0.01	0.37							60.3693	166.322	360.568	194.246	1.61451					0.124193
0.01	0.38							60.3693	166.447	370.313	203.867	1.49032					0.124193
0.01	0.39							60.3693	166.571	380.058	213.488	1.36612					0.124193
0.01	0.4							60.3693	166.695	389.804	223.109	1.24193					0.124193
0.01	0.41							60.3693	166.819	399.549	232.729	1.11774					0.124193
0.01	0.42							60.3693	166.943	409.294	242.35	0.993544					0.124193
0.01	0.43							60.3693	167.068	419.039	251.971	0.869351					0.124193
0.01	0.44							60.3693	167.192	428.784	261.592	0.745158					0.124193
0.01	0.45							60.3693	167.316	438.529	271.213	0.620965					0.124193
0.01	0.46							60.3693	167.44	448.274	280.834	0.496772					0.124193
0.01	0.47							60.3693	167.564	458.019	290.455	0.372579					0.124193
0.01	0.48							60.3693	167.689	467.764	300.076	0.248386					0.124193
0.01	0.49							60.3693	167.813	477.509	309.697	0.124193					0.124193
0.01	0.5							60.3693	167.937	487.254	319.318	0					0.124193
X	Cum X	Time(min)	a	b	y0	x0	Ci (calculated from equationfit in sigma plot)	Total N	Integral Total N-Ci [cm/sec1/2] A	Area X x sec L	Area rectangle - solute integral	Total integral- sum of integral					new N
		IMMISCIBLE
0.01	0.01	80	928.49	-0.0223	46.2551	0.1823	974.483	974.336	9.26386	9.26533	0.00147862	154.517					9.26386	163.781	0.121702	1345.75
0.01	0.02							974.104	18.5254	18.5307	0.00527161	145.256					9.26154
0.01	0.03							973.742	27.7833	27.796	0.0126862	135.998					9.25792
0.01	0.04							973.175	37.0356	37.0613	0.0257661	126.745					9.25225
0.01	0.05							972.29	46.279	46.3267	0.0477031	117.502					9.2434
0.01	0.06							970.906	55.5085	55.592	0.083475	108.272					9.22956
0.01	0.07							968.748	64.7165	64.8573	0.140828	99.0645					9.20798
0.01	0.08							965.389	73.8909	74.1227	0.23177	89.8901					9.17439
0.01	0.09							960.178	83.0132	83.388	0.374822	80.7678					9.12228
0.01	0.1							952.136	92.055	92.6533	0.598293	71.726					9.04186
0.01	0.11							939.824	100.974	101.919	0.944883	62.8072					8.91874
0.01	0.12							921.204	109.706	111.184	1.47768	54.0747					8.73254
0.01	0.13							893.557	118.162	120.449	2.28694	45.6186					8.45607
0.01	0.14							853.61	126.219	129.715	3.49567	37.562					8.0566
0.01	0.15							798.106	133.721	138.98	5.25945	30.0604					7.50156
0.01	0.16	Average	stdev					725.035	140.491	148.245	7.75393	23.2896					6.77085
0.01	0.17	0.175	0.00707107					635.381	146.366	157.511	11.1449	17.4153					5.87431
0.01	0.18							534.42	151.23	166.776	15.5456	12.5506					4.8647
0.01	0.19							431.137	155.062	176.041	20.979	8.7187					3.83187
0.01	0.2							335.359	157.936	185.307	27.3703	5.84461					2.87409
0.01	0.21							254.294	160	194.572	34.5722	3.78117					2.06344
0.01	0.22							190.82	161.429	203.837	42.4088	2.35247					1.4287
0.01	0.23							144.083	162.39	213.103	50.7128	1.39114					0.96133
0.01	0.24							111.204	163.022	222.368	59.3456	0.758605					0.632538
0.01	0.25							88.8089	163.431	231.633	68.2024	0.350015					0.408589
0.01	0.26							73.8889	163.69	240.899	77.2083	0.0906262					0.259389
0.01	0.27							64.0947	163.852	250.164	86.3122	-0.0708212					0.161447
0.01	0.28							57.7277	163.95	259.429	95.4797	-0.168598					0.0977768
0.01	0.29							53.6147	164.006	268.695	104.688	-0.225245					0.0566469
0.01	0.3							50.9687	164.036	277.96	113.924	-0.255432					0.0301866
0.01	0.31							49.2709	164.05	287.225	123.176	-0.26864					0.0132085
0.01	0.32							48.1833	164.052	296.491	132.439	-0.270973					0.00233311
0.01	0.33							47.4874	164.047	305.756	141.709	-0.266348					-0.00462563
0.01	0.34							47.0425	164.038	315.021	150.983	-0.257272					-0.00907515
0.01	0.35							46.7581	164.026	324.287	160.26	-0.245353					-0.011919
0.01	0.36							46.5764	164.013	333.552	169.539	-0.231617					-0.0137361
0.01	0.37							46.4603	163.998	342.817	178.82	-0.216721					-0.0148969
0.01	0.38							46.3862	163.982	352.083	188.101	-0.201082					-0.0156383
0.01	0.39							46.3388	163.966	361.348	197.382	-0.18497					-0.0161119
0.01	0.4							46.3086	163.95	370.613	206.664	-0.168556					-0.0164144
0.01	0.41							46.2892	163.933	379.879	215.946	-0.151948					-0.0166076
0.01	0.42							46.2769	163.916	389.144	225.228	-0.135217					-0.016731
0.01	0.43							46.269	163.899	398.409	234.51	-0.118408					-0.0168098
0.01	0.44							46.264	163.883	407.675	243.792	-0.101548					-0.0168601
0.01	0.45							46.2608	163.866	416.94	253.074	-0.0846553					-0.0168922
0.01	0.46							46.2587	163.849	426.205	262.357	-0.0677426					-0.0169127
0.01	0.47							46.2574	163.832	435.471	271.639	-0.0508167					-0.0169258
0.01	0.48							46.2566	163.815	444.736	280.921	-0.0338825					-0.0169342
0.01	0.49							46.256	163.798	454.001	290.203	-0.016943					-0.0169396
0.01	0.5							46.2557	163.781	463.267	299.486	0					-0.016943
X	Cum X	Time(min)	a	b	y0	x0	Ci (calculated from equationfit in sigma plot)	Total N	Integral Total N-Ci [cm/sec1/2] A	Area X x sec L	Area rectangle - solute integral	Total integral- sum of integral					new N
		IMMISCIBLE
0.01	0.01	320	921.929	-0.0112	50.4825	0.1698	972.411	972.411	9.24461	9.24461	3.46319e-06	143.955					9.24461	153.2	0.121702	1258.81
0.01	0.02							972.41	18.4892	18.4892	1.53838e-05	134.711					9.2446
0.01	0.03							972.408	27.7338	27.7338	4.79583e-05	125.466					9.24458
0.01	0.04							972.403	36.9783	36.9784	0.000130971	116.222					9.24453
0.01	0.05							972.39	46.2227	46.223	0.000337157	106.977					9.2444
0.01	0.06							972.36	55.4668	55.4677	0.000844129	97.7333					9.2441
0.01	0.07							972.287	64.7102	64.7123	0.00208557	88.4899					9.24337
0.01	0.08							972.107	73.9517	73.9569	0.00512015	79.2483					9.24157
0.01	0.09							971.67	83.1889	83.2015	0.0125309	70.0111					9.2372
0.01	0.1							970.603	92.4155	92.4461	0.030611	60.7846					9.22653
0.01	0.11							968.008	101.616	101.691	0.0746433	51.584					9.20058
0.01	0.12							961.731	110.754	110.935	0.181442	42.4462					9.13781
0.01	0.13							946.758	119.742	120.18	0.437974	33.4581					8.98808
0.01	0.14							912.18	128.384	129.425	1.04028	24.8159					8.6423
0.01	0.15							837.986	136.285	138.669	2.38454	16.9155					7.90036
0.01	0.16	Average	stdev					701.166	142.817	147.914	5.09699	10.3833					6.53216
0.01	0.17	0.165	0.00707107					507.331	147.411	157.158	9.74778	5.78952					4.59381
0.01	0.18							314.941	150.08	166.403	16.3225	3.11961					2.66991
0.01	0.19							180.859	151.41	175.648	24.238	1.79052					1.32909
0.01	0.2							108.734	152.017	184.892	32.8748	1.18268					0.60784
0.01	0.21							75.2601	152.291	194.137	41.8463	0.909584					0.273101
0.01	0.22							60.7921	152.419	203.381	50.9625	0.781163					0.128421
0.01	0.23							54.7322	152.487	212.626	60.1393	0.713341					0.067822
0.01	0.24							52.2274	152.53	221.871	69.3411	0.670566					0.0427743
0.01	0.25							51.1978	152.562	231.115	78.5532	0.638088					0.0324782
0.01	0.26							50.7755	152.59	240.36	87.7696	0.609833					0.0282555
0.01	0.27							50.6025	152.617	249.604	96.9877	0.583307					0.0265252
0.01	0.28							50.5317	152.643	258.849	106.206	0.557491					0.0258165
0.01	0.29							50.5026	152.668	268.094	115.426	0.531965					0.0255263
0.01	0.3							50.4907	152.694	277.338	124.645	0.506557					0.0254074
0.01	0.31							50.4859	152.719	286.583	133.864	0.481198					0.0253587
0.01	0.32							50.4839	152.744	295.827	143.083	0.45586					0.0253388
0.01	0.33							50.4831	152.77	305.072	152.303	0.430529					0.0253307
0.01	0.34							50.4827	152.795	314.317	161.522	0.405202					0.0253273
0.01	0.35							50.4826	152.82	323.561	170.741	0.379876					0.0253259
0.01	0.36							50.4825	152.846	332.806	179.96	0.35455					0.0253254
0.01	0.37							50.4825	152.871	342.051	189.18	0.329225					0.0253252
0.01	0.38							50.4825	152.896	351.295	198.399	0.3039					0.0253251
0.01	0.39							50.4825	152.922	360.54	207.618	0.278575					0.025325
0.01	0.4							50.4825	152.947	369.784	216.838	0.25325					0.025325
0.01	0.41							50.4825	152.972	379.029	226.057	0.227925					0.025325
0.01	0.42							50.4825	152.997	388.274	235.276	0.2026					0.025325
0.01	0.43							50.4825	153.023	397.518	244.495	0.177275					0.025325
0.01	0.44							50.4825	153.048	406.763	253.715	0.15195					0.025325
0.01	0.45							50.4825	153.073	416.007	262.934	0.126625					0.025325
0.01	0.46							50.4825	153.099	425.252	272.153	0.1013					0.025325
0.01	0.47							50.4825	153.124	434.497	281.372	0.075975					0.025325
0.01	0.48							50.4825	153.149	443.741	290.592	0.05065					0.025325
0.01	0.49							50.4825	153.175	452.986	299.811	0.025325					0.025325
0.01	0.5							50.4825	153.2	462.23	309.03	0					0.025325

## Sheet: SOLUTE FRONT soln N
X	Cum X	Time(min)	a	b	y0	x0	Ci (calculated from equationfit in sigma plot)	Total N	Integral Total N-Ci [cm/sec1/2] A	Area X x sec L	Area rectangle - solute integral	Total integral- sum of integral		avg front	SD		new N		S	Soln Conc
		DILUTE
0.01	0.01	80	1502.8	-0.0147	113.887	0.1804	1616.68	1616.68	15.0279	15.6873	0.659439	280.214		#DIV/0!	#DIV/0!		15.6873	296.56	0.126344	2347.25
0.01	0.02							1616.66	30.0557	31.3747	1.31901	265.186					15.6871
0.01	0.03							1616.64	45.7425	47.062	1.31948	249.499					15.6869
0.01	0.04							1616.58	61.4288	62.7493	1.32048	233.813					15.6863
0.01	0.05							1616.48	77.1141	78.4367	1.32252	218.127					15.6853
0.01	0.06							1616.27	92.7974	94.124	1.32662	202.444					15.6832
0.01	0.07							1615.87	108.477	109.811	1.33477	186.765					15.6792
0.01	0.08							1615.07	124.148	125.499	1.35093	171.094					15.6712
0.01	0.09							1613.49	139.803	141.186	1.38286	155.438					15.6554
0.01	0.1							1610.38	155.427	156.873	1.44585	139.814					15.6243
0.01	0.11							1604.29	170.991	172.561	1.56978	124.251					15.5634
0.01	0.12							1592.4	186.435	188.248	1.81258	108.806					15.4445
0.01	0.13							1569.48	201.651	203.935	2.28461	93.5909					15.2153
0.01	0.14							1526.25	216.434	219.623	3.18896	78.8079					14.783
0.01	0.15							1448.01	230.434	235.31	4.87569	64.8073					14.0006
0.01	0.16							1316.48	243.12	250.997	7.87772	52.122					12.6853
0.01	0.17							1120.53	253.845	266.685	12.8392	41.3962					10.7258
0.01	0.18							875.511	262.121	282.372	20.251	33.1206					8.27561
0.01	0.19							628.297	267.925	298.059	30.1348	27.3171					5.80347
0.01	0.2							427.385	271.719	313.747	42.0278	23.5228					3.79435
0.01	0.21							290.89	274.148	329.434	55.2857	21.0934					2.4294
0.01	0.22							209.068	275.759	345.121	69.3619	19.4822					1.61118
0.01	0.23							163.65	276.916	360.809	83.8922	18.3252					1.157
0.01	0.24							139.509	277.832	376.496	98.664	17.4096					0.915595
0.01	0.25							126.974	278.622	392.183	113.561	16.6193					0.790244
0.01	0.26							120.544	279.348	407.871	128.522	15.8934					0.725941
0.01	0.27							117.266	280.041	423.558	143.517	15.2002					0.693161
0.01	0.28							115.6	280.718	439.245	158.527	14.5237					0.676503
0.01	0.29							114.755	281.386	454.933	173.547	13.8557					0.668053
0.01	0.3							114.327	282.05	470.62	188.57	13.1919					0.663769
0.01	0.31							114.11	282.711	486.307	203.596	12.5303					0.661598
0.01	0.32							114	283.372	501.995	218.623	11.8698					0.660499
0.01	0.33							113.944	284.032	517.682	233.65	11.2099					0.659942
0.01	0.34							113.916	284.691	533.369	248.678	10.5502					0.65966
0.01	0.35							113.902	285.351	549.057	263.706	9.8907					0.659517
0.01	0.36							113.894	286.01	564.744	278.734	9.23126					0.659444
0.01	0.37							113.891	286.67	580.431	293.762	8.57185					0.659408
0.01	0.38							113.889	287.329	596.119	308.789	7.91246					0.659389
0.01	0.39							113.888	287.989	611.806	323.817	7.25308					0.65938
0.01	0.4							113.887	288.648	627.493	338.845	6.59371					0.659375
0.01	0.41							113.887	289.307	643.181	353.873	5.93433					0.659372
0.01	0.42							113.887	289.967	658.868	368.901	5.27496					0.659371
0.01	0.43							113.887	290.626	674.555	383.929	4.61559					0.659371
0.01	0.44							113.887	291.285	690.243	398.957	3.95622					0.65937
0.01	0.45							113.887	291.945	705.93	413.985	3.29685					0.65937
0.01	0.46							113.887	292.604	721.617	429.013	2.63748					0.65937
0.01	0.47							113.887	293.263	737.305	444.041	1.97811					0.65937
0.01	0.48							113.887	293.923	752.992	459.069	1.31874					0.65937
0.01	0.49							113.887	294.582	768.679	474.097	0.65937					0.65937
0.01	0.5							113.887	295.242	784.367	489.125	0					0.65937
X	Cum X	Time(min)	a	b	y0	x0	Ci (calculated from equationfit in sigma plot)	Total N	Integral Total N-Ci [cm/sec1/2] A	Area X x sec L	Area rectangle - solute integral	Total integral- sum of integral					new N
		DILUTE
0.01	0.01	320	1548.28	-0.0123	103.125	0.1705	1651.4	1651.4	16.0345	16.0345	1.85474e-05	267.793					16.0345	283.828	0.126345	2246.46
0.01	0.02							1651.4	32.069	32.069	7.8913e-05	251.759					16.0345
0.01	0.03							1651.39	48.1033	48.1036	0.000233564	235.724					16.0344
0.01	0.04							1651.36	64.1375	64.1381	0.000600796	219.69					16.0341
0.01	0.05							1651.32	80.1711	80.1726	0.00144731	203.657					16.0337
0.01	0.06							1651.21	96.2037	96.2071	0.00337433	187.624					16.0326
0.01	0.07							1650.97	112.234	112.242	0.00773701	171.594					16.0302
0.01	0.08							1650.42	128.259	128.276	0.0175885	155.569					16.0247
0.01	0.09							1649.18	144.271	144.311	0.0398012	139.557					16.0123
0.01	0.1							1646.4	160.255	160.345	0.0898123	123.572					15.9845
0.01	0.11							1640.17	176.178	176.38	0.202134	107.65					15.9222
0.01	0.12							1626.3	191.961	192.414	0.453118	91.8666					15.7835
0.01	0.13							1595.94	207.441	208.449	1.00774	76.3867					15.4799
0.01	0.14							1531.73	222.279	224.483	2.20448	61.5489					14.8378
0.01	0.15							1405.43	235.854	240.518	4.6642	47.9741					13.5748
0.01	0.16							1188.99	247.264	256.552	9.28836	36.5638					11.4104
0.01	0.17							892.997	255.714	272.587	16.8724	28.1133					8.45047
0.01	0.18							592.334	261.158	288.621	27.4631	22.6695					5.44384
0.01	0.19							366.39	264.343	304.656	40.3132	19.4851					3.1844
0.01	0.2							232.092	266.184	320.69	54.5063	17.6437					1.84142
0.01	0.21							163.105	267.336	336.725	69.3893	16.4921					1.15155
0.01	0.22							130.314	268.159	352.759	84.6002	15.6685					0.823638
0.01	0.23							115.303	268.833	368.794	99.9611	14.9949					0.673531
0.01	0.24							108.55	269.439	384.828	115.39	14.3889					0.606002
0.01	0.25							105.536	270.015	400.863	130.848	13.8131					0.575861
0.01	0.26							104.196	270.577	416.897	146.32	13.2506					0.562455
0.01	0.27							103.6	271.134	432.932	161.798	12.6941					0.556502
0.01	0.28							103.336	271.687	448.966	177.279	12.1403					0.55386
0.01	0.29							103.219	272.24	465.001	192.761	11.5876					0.552688
0.01	0.3							103.167	272.792	481.036	208.243	11.0354					0.552168
0.01	0.31							103.144	273.344	497.07	223.726	10.4835					0.551938
0.01	0.32							103.134	273.896	513.105	239.208	9.93164					0.551836
0.01	0.33							103.129	274.448	529.139	254.691	9.37985					0.55179
0.01	0.34							103.127	275	545.174	270.174	8.82808					0.55177
0.01	0.35							103.126	275.551	561.208	285.657	8.27632					0.551761
0.01	0.36							103.126	276.103	577.243	301.139	7.72456					0.551757
0.01	0.37							103.126	276.655	593.277	316.622	7.1728					0.551755
0.01	0.38							103.125	277.207	609.312	332.105	6.62105					0.551755
0.01	0.39							103.125	277.758	625.346	347.588	6.06929					0.551754
0.01	0.4							103.125	278.31	641.381	363.071	5.51754					0.551754
0.01	0.41							103.125	278.862	657.415	378.553	4.96579					0.551754
0.01	0.42							103.125	279.414	673.45	394.036	4.41403					0.551754
0.01	0.43							103.125	279.965	689.484	409.519	3.86228					0.551754
0.01	0.44							103.125	280.517	705.519	425.002	3.31052					0.551754
0.01	0.45							103.125	281.069	721.553	440.484	2.75877					0.551754
0.01	0.46							103.125	281.621	737.588	455.967	2.20702					0.551754
0.01	0.47							103.125	282.172	753.622	471.45	1.65526					0.551754
0.01	0.48							103.125	282.724	769.657	486.933	1.10351					0.551754
0.01	0.49							103.125	283.276	785.691	502.415	0.551754					0.551754
0.01	0.5							103.125	283.828	801.726	517.898	0					0.551754
X	Cum X	Time(min)	a	b	y0	x0	Ci (calculated from equationfit in sigma plot)	Total N	Integral Total N-Ci [cm/sec1/2] A	Area X x sec L	Area rectangle - solute integral	Total integral- sum of integral					new N
		IMMISCIBLE
0.01	0.01	80	1454.98	-0.0201	70.2479	0.1849	1525.08	1524.99	14.7704	14.7713	0.000948357	258.134					14.7704	272.904	0.121702	2242.39
0.01	0.02							1524.83	29.5392	29.5427	0.00345614	243.365					14.7688
0.01	0.03							1524.58	44.3055	44.314	0.00852786	228.599					14.7663
0.01	0.04							1524.16	59.0675	59.0854	0.0178143	213.837					14.7621
0.01	0.05							1523.46	73.8227	73.8567	0.0340272	199.082					14.7551
0.01	0.06							1522.33	88.5664	88.628	0.061617	184.338					14.7438
0.01	0.07							1520.46	103.292	103.399	0.107879	169.613					14.7251
0.01	0.08							1517.4	117.986	118.171	0.184745	154.918					14.6945
0.01	0.09							1512.39	132.63	132.942	0.311665	140.274					14.6444
0.01	0.1							1504.24	147.193	147.713	0.520154	125.711					14.5629
0.01	0.11							1491.02	161.624	162.485	0.860806	111.28					14.4307
0.01	0.12							1469.8	175.842	177.256	1.4136	97.0617					14.2185
0.01	0.13							1436.26	189.726	192.027	2.30183	83.1786					13.8831
0.01	0.14							1384.46	203.091	206.799	3.70811	69.8135					13.3651
0.01	0.15							1307.3	215.684	221.57	5.88593	57.22					12.5935
0.01	0.16							1198.38	227.188	236.341	9.15299	45.7157					11.5043
0.01	0.17							1055.68	237.266	251.113	13.8471	35.6385					10.0773
0.01	0.18							885.977	245.646	265.884	20.2381	27.2582					8.38027
0.01	0.19							705.938	252.226	280.655	28.4296	20.6783					6.57988
0.01	0.2							536.643	257.113	295.427	38.314	15.7914					4.88693
0.01	0.21							394.586	260.579	310.198	49.619	12.325					3.46636
0.01	0.22							286.34	262.963	324.969	62.0064	9.94112					2.3839
0.01	0.23							209.762	264.581	339.741	75.1596	8.323					1.61812
0.01	0.24							158.391	265.686	354.512	88.8266	7.21859					1.10441
0.01	0.25							125.146	266.458	369.284	102.826	6.44662					0.771962
0.01	0.26							104.129	267.019	384.055	117.035	5.88483					0.561794
0.01	0.27							91.039	267.45	398.826	131.376	5.45394					0.43089
0.01	0.28							82.961	267.8	413.598	145.797	5.10383					0.35011
0.01	0.29							78.0045	268.101	428.369	160.268	4.80328					0.300545
0.01	0.3							74.9741	268.371	443.14	174.769	4.53304					0.270241
0.01	0.31							73.1253	268.623	457.912	189.289	4.28129					0.251753
0.01	0.32							71.9988	268.863	472.683	203.82	4.0408					0.240488
0.01	0.33							71.313	269.097	487.454	218.357	3.80717					0.23363
0.01	0.34							70.8957	269.326	502.226	232.899	3.57771					0.229457
0.01	0.35							70.6419	269.553	516.997	247.444	3.35079					0.226919
0.01	0.36							70.4875	269.779	531.768	261.989	3.12542					0.225375
0.01	0.37							70.3936	270.003	546.54	276.536	2.90098					0.224436
0.01	0.38							70.3365	270.227	561.311	291.084	2.67712					0.223865
0.01	0.39							70.3018	270.451	576.082	305.632	2.4536					0.223518
0.01	0.4							70.2807	270.674	590.854	320.18	2.23029					0.223307
0.01	0.41							70.2678	270.897	605.625	334.728	2.00712					0.223178
0.01	0.42							70.26	271.12	620.396	349.276	1.78402					0.2231
0.01	0.43							70.2553	271.343	635.168	363.824	1.56096					0.223053
0.01	0.44							70.2524	271.566	649.939	378.373	1.33794					0.223024
0.01	0.45							70.2506	271.789	664.71	392.921	1.11493					0.223006
0.01	0.46							70.2496	272.012	679.482	407.469	0.891938					0.222996
0.01	0.47							70.2489	272.235	694.253	422.018	0.668949					0.222989
0.01	0.48							70.2485	272.458	709.024	436.566	0.445964					0.222985
0.01	0.49							70.2483	272.681	723.796	451.114	0.222981					0.222983
0.01	0.5							70.2481	272.904	738.567	465.663	0					0.222981
X	Cum X	Time(min)	a	b	y0	x0	Ci (calculated from equationfit in sigma plot)	Total N	Integral Total N-Ci [cm/sec1/2] A	Area X x sec L	Area rectangle - solute integral	Total integral- sum of integral					new N
		IMMISCIBLE
0.01	0.01	320	1502.26	-0.0115	80.5268	0.1682	1582.78	1582.78	15.3483	15.3483	9.25632e-06	246.108					15.3483	261.457	0.121702	2148.33
0.01	0.02							1582.78	30.6966	30.6967	4.0597e-05	230.76					15.3483
0.01	0.03							1582.77	46.0449	46.045	0.000124628	215.412					15.3482
0.01	0.04							1582.76	61.393	61.3933	0.000334369	200.064					15.3481
0.01	0.05							1582.73	76.7408	76.7417	0.000844032	184.716					15.3478
0.01	0.06							1582.66	92.0879	92.09	0.00206922	169.369					15.3471
0.01	0.07							1582.49	107.433	107.438	0.00500129	154.023					15.3454
0.01	0.08							1582.08	122.775	122.787	0.0120042	138.682					15.3413
0.01	0.09							1581.11	138.106	138.135	0.0287107	123.35					15.3316
0.01	0.1							1578.8	153.415	153.483	0.0685181	108.042					15.3085
0.01	0.11							1573.32	168.669	168.832	0.163155	92.7883					15.2537
0.01	0.12							1560.4	183.793	184.18	0.387002	77.6638					15.1245
0.01	0.13							1530.46	198.618	199.528	0.910275	62.8387					14.8251
0.01	0.14							1463.69	212.775	214.877	2.10125	48.6814					14.1574
0.01	0.15							1326.76	225.564	230.225	4.66149	35.8933					12.7881
0.01	0.16							1088.65	235.971	245.573	9.60281	25.4863					10.407
0.01	0.17							772.991	243.221	260.922	17.7007	18.2358					7.25041
0.01	0.18							476.887	247.51	276.27	28.7597	13.9465					4.28937
0.01	0.19							276.724	249.798	291.618	41.8203	11.6587					2.28774
0.01	0.2							169.51	251.014	306.967	55.953	10.4431					1.2156
0.01	0.21							119.152	251.726	322.315	70.5893	9.73112					0.712016
0.01	0.22							96.9612	252.216	337.663	85.4476	9.24101					0.490112
0.01	0.23							87.4591	252.611	353.012	100.401	8.84592					0.395091
0.01	0.24							83.4402	252.966	368.36	115.394	8.49102					0.354902
0.01	0.25							81.7493	253.304	383.708	130.405	8.15303					0.337993
0.01	0.26							81.0394	253.635	399.057	145.422	7.82213					0.330894
0.01	0.27							80.7417	253.963	414.405	160.442	7.49421					0.327917
0.01	0.28							80.6169	254.289	429.753	175.464	7.16755					0.326669
0.01	0.29							80.5646	254.615	445.102	190.486	6.8414					0.326146
0.01	0.3							80.5426	254.941	460.45	205.509	6.51547					0.325926
0.01	0.31							80.5334	255.267	475.798	220.531	6.18964					0.325834
0.01	0.32							80.5296	255.593	491.147	235.554	5.86384					0.325796
0.01	0.33							80.528	255.919	506.495	250.576	5.53806					0.32578
0.01	0.34							80.5273	256.244	521.843	265.599	5.21229					0.325773
0.01	0.35							80.527	256.57	537.192	280.621	4.88652					0.32577
0.01	0.36							80.5269	256.896	552.54	295.644	4.56075					0.325769
0.01	0.37							80.5268	257.222	567.888	310.667	4.23498					0.325768
0.01	0.38							80.5268	257.548	583.237	325.689	3.90922					0.325768
0.01	0.39							80.5268	257.873	598.585	340.712	3.58345					0.325768
0.01	0.4							80.5268	258.199	613.933	355.734	3.25768					0.325768
0.01	0.41							80.5268	258.525	629.282	370.757	2.93191					0.325768
0.01	0.42							80.5268	258.851	644.63	385.779	2.60614					0.325768
0.01	0.43							80.5268	259.176	659.978	400.802	2.28038					0.325768
0.01	0.44							80.5268	259.502	675.327	415.824	1.95461					0.325768
0.01	0.45							80.5268	259.828	690.675	430.847	1.62884					0.325768
0.01	0.46							80.5268	260.154	706.023	445.87	1.30307					0.325768
0.01	0.47							80.5268	260.479	721.372	460.892	0.977304					0.325768
0.01	0.48							80.5268	260.805	736.72	475.915	0.651536					0.325768
0.01	0.49							80.5268	261.131	752.068	490.937	0.325768					0.325768
0.01	0.5							80.5268	261.457	767.417	505.96	0					0.325768

## Sheet: Solute Front Adsorbed N
X	Cum X	mid point cum X	Time(min)	bulk Density	Theta V	Intital C (total)	Initial Cw	Initial Ca	a	b	y0	x0	Ci (calculated from equation fit in sigma plot)	Adosrbed N	Integral Adsorbed N-Ci [cm/sec1/2] A	Area X x sec L	Area rectangle - solute integral	Total integral- sum of integral	Avg front	stddev Front
			DILUTE
0.01	0.01	0.005	80	1.05336	0.548	47.95	67.9941	12.5769	140.399	-0.0109	22.007	0.1887	162.406	162.406	1.40399	1.40399	6.39449e-08	24.3873	#DIV/0!	#DIV/0!
0.01	0.02	0.015			0.548		67.9941	12.5769						162.406	2.80798	2.80798	2.87935e-07	22.9833
0.01	0.03	0.025			0.548		67.9941	12.5769						162.406	4.21197	4.21197	9.12493e-07	21.5793
0.01	0.04	0.035			0.548		67.9941	12.5769						162.406	5.61596	5.61596	2.53961e-06	20.1753
0.01	0.05	0.045			0.548		67.9941	12.5769						162.406	7.01994	7.01995	6.67599e-06	18.7714
0.01	0.06	0.055			0.548		67.9941	12.5769						162.405	8.42392	8.42394	1.70926e-05	17.3674
0.01	0.07	0.065			0.548		67.9941	12.5769						162.403	9.82789	9.82793	4.32276e-05	15.9634
0.01	0.08	0.075			0.548		67.9941	12.5769						162.399	11.2318	11.2319	0.000108702	14.5595
0.01	0.09	0.085			0.548		67.9941	12.5769						162.39	12.6356	12.6359	0.000272626	13.1557
0.01	0.1	0.095			0.548		67.9941	12.5769						162.365	14.0392	14.0399	0.000682897	11.7521
0.01	0.11	0.105			0.548		67.9941	12.5769						162.303	15.4422	15.4439	0.00170936	10.3491
0.01	0.12	0.115			0.547999		67.9941	12.5769						162.149	16.8436	16.8479	0.00427568	8.94769
0.01	0.13	0.125			0.547999		67.9942	12.5769						161.765	18.2412	18.2519	0.0106813	7.55011
0.01	0.14	0.135			0.547997		67.9943	12.577						160.814	19.6293	19.6559	0.0266044	6.16204
0.01	0.15	0.145			0.547994		67.9946	12.577						158.487	20.9941	21.0598	0.0657899	4.79724
0.01	0.16	0.155			0.547988		67.9952	12.5771						152.993	22.3039	22.4638	0.159917	3.48737
0.01	0.17	0.165			0.547975		67.9963	12.5773						141.004	23.4939	23.8678	0.373941	2.29741
0.01	0.18	0.175			0.547949		67.9988	12.5778						118.824	24.4621	25.2718	0.809764	1.32924
0.01	0.19	0.185			0.547895		68.0037	12.5786						88.0252	25.1222	26.6758	1.55357	0.669059
0.01	0.2	0.195			0.547784		68.014	12.5805						58.7617	25.4898	28.0798	2.59001	0.301512
0.01	0.21	0.205			0.547555		68.0352	12.5843						39.4311	25.664	29.4838	3.81976	0.127271
0.01	0.22	0.215			0.547082		68.079	12.5921						29.5292	25.7392	30.8878	5.14853	0.0520488
0.01	0.23	0.225			0.54611		68.1691	12.6081						25.1124	25.7703	32.2918	6.52147	0.0209952
0.01	0.24	0.235			0.544119		68.3546	12.6412						23.2644	25.7829	33.6958	7.91288	0.00842086
0.01	0.25	0.245			0.540071		68.7348	12.709						22.5121	25.7879	35.0997	9.31182	0.0033697
0.01	0.26	0.255			0.531968		69.5088	12.8468						22.2093	25.7899	36.5037	10.7138	0.00134718
0.01	0.27	0.265			0.516248		71.0617	13.123						22.0879	25.7908	37.9077	12.117	0.00053839
0.01	0.28	0.275			0.487513		74.0894	13.6603						22.0393	25.7911	39.3117	13.5206	0.000215132
0.01	0.29	0.285			0.440282		79.6762	14.6472						22.0199	25.7912	40.7157	14.9245	8.5958e-05
0.01	0.3	0.295			0.37473		89.0137	16.2838						22.0122	25.7913	42.1197	16.3284	3.43446e-05
0.01	0.31	0.305			0.30228		102.318	18.5882						22.0091	25.7913	43.5237	17.7324	1.37222e-05
0.01	0.32	0.315			0.239855		117.539	21.1858						22.0078	25.7913	44.9277	19.1364	5.48265e-06
0.01	0.33	0.325			0.196603		131.143	23.4731						22.0073	25.7913	46.3317	20.5404	2.19056e-06
0.01	0.34	0.335			0.170962		140.863	25.0879						22.0071	25.7913	47.7357	21.9444	8.75219e-07
0.01	0.35	0.345			0.157143		146.747	26.0579						22.0071	25.7913	49.1396	23.3484	3.49684e-07
0.01	0.36	0.355			0.150078		149.959	26.5847						22.007	25.7913	50.5436	24.7523	1.39709e-07
0.01	0.37	0.365			0.146562		151.612	26.8553						22.007	25.7913	51.9476	26.1563	5.58157e-08
0.01	0.38	0.375			0.144836		152.437	26.9902						22.007	25.7913	53.3516	27.5603	2.22968e-08
0.01	0.39	0.385			0.143994		152.843	27.0565						22.007	25.7913	54.7556	28.9643	8.90491e-09
0.01	0.4	0.395			0.143585		153.041	27.0888						22.007	25.7913	56.1596	30.3683	3.55458e-09
0.01	0.41	0.405			0.143387		153.137	27.1046						22.007	25.7913	57.5636	31.7723	1.41721e-09
0.01	0.42	0.415			0.14329		153.184	27.1122						22.007	25.7913	58.9676	33.1763	5.63578e-10
0.01	0.43	0.425			0.143244		153.207	27.1159						22.007	25.7913	60.3716	34.5803	2.22844e-10
0.01	0.44	0.435			0.143221		153.218	27.1177						22.007	25.7913	61.7756	35.9843	8.70379e-11
0.01	0.45	0.445			0.14321		153.223	27.1185						22.007	25.7913	63.1795	37.3883	3.31113e-11
0.01	0.46	0.455			0.143205		153.226	27.119						22.007	25.7913	64.5835	38.7922	1.1898e-11
0.01	0.47	0.465			0.143202		153.227	27.1192						22.007	25.7913	65.9875	40.1962	3.75522e-12
0.01	0.48	0.475			0.143201		153.227	27.1193						22.007	25.7913	67.3915	41.6002	8.34888e-13
0.01	0.49	0.485			0.143201		153.228	27.1193						22.007	25.7913	68.7955	43.0042	0
0.01	0.5	0.495			0.1432		153.228	27.1193						22.007	25.7913	70.1995	44.4082	0
X	Cum X		Time(min)	bulk Density	Theta G	Intital C (total)	Initial Cw	Initial Ca	a	b	y0	x0	Ci (calculated from equation fit in sigma plot)	Adosrbed N	Integral Adsorbed N-Ci [cm/sec1/2] A	Area X x sec L	Area rectangle - solute integral	Total integral- sum of integral	Avg front	stddev Front
			DILUTE
0.01	0.01		320	1.03359	0.5534	47.95	66.5485	12.9878	144.738	-0.0103	19.9732	0.1777	164.711	164.711	1.44738	1.51723	0.0698541	23.5489
0.01	0.02				0.548		67.0391	13.0737						164.711	2.89476	3.03361	0.138849	22.1015
0.01	0.03				0.548		67.0391	13.0737						164.711	4.34214	4.54998	0.207844	20.6541
0.01	0.04				0.548		67.0391	13.0737						164.711	5.78951	6.06635	0.276841	19.2067
0.01	0.05				0.548		67.0391	13.0737						164.711	7.23689	7.58273	0.345842	17.7593
0.01	0.06				0.548		67.0391	13.0737						164.71	8.68425	9.0991	0.414852	16.312
0.01	0.07				0.548		67.0391	13.0737						164.707	10.1316	10.6155	0.483888	14.8646
0.01	0.08				0.548		67.0391	13.0737						164.7	11.5789	12.1318	0.552993	13.4174
0.01	0.09				0.548		67.0391	13.0737						164.682	13.0259	13.6482	0.622277	11.9703
0.01	0.1				0.548		67.0391	13.0737						164.635	14.4726	15.1646	0.692038	10.5237
0.01	0.11				0.548		67.0391	13.0737						164.509	15.9179	16.681	0.763053	9.07832
0.01	0.12				0.547999		67.0391	13.0738						164.179	17.36	18.1973	0.837369	7.63626
0.01	0.13				0.547999		67.0392	13.0738						163.314	18.7934	19.7137	0.920331	6.20285
0.01	0.14				0.547997		67.0393	13.0738						161.081	20.2045	21.2301	1.02563	4.79178
0.01	0.15				0.547994		67.0396	13.0738						155.505	21.5598	22.7465	1.18669	3.43646
0.01	0.16				0.547988		67.0402	13.0739						142.701	22.787	24.2628	1.47578	2.20919
0.01	0.17				0.547975		67.0413	13.0741						118.2	23.7693	25.7792	2.00989	1.22692
0.01	0.18				0.547949		67.0437	13.0746						84.2955	24.4125	27.2956	2.88303	0.583699
0.01	0.19				0.547895		67.0486	13.0754						53.6267	24.7491	28.8119	4.06285	0.247165
0.01	0.2				0.547784		67.0588	13.0772						34.8716	24.8981	30.3283	5.43021	0.098181
0.01	0.21				0.547555		67.0798	13.0809						26.0015	24.9583	31.8446	6.88623	0.0378983
0.01	0.22				0.547082		67.1232	13.0885						22.3171	24.9818	33.3608	8.37902	0.0144596
0.01	0.23				0.54611		67.2125	13.1041						20.87	24.9907	34.8769	9.88612	0.00549193
0.01	0.24				0.544119		67.3962	13.1363						20.3142	24.9942	36.3926	11.3985	0.00208229
0.01	0.25				0.540071		67.7728	13.2022						20.1025	24.9954	37.9077	12.9123	0.000788989
0.01	0.26				0.531968		68.5395	13.3363						20.0222	24.9959	39.4214	14.4255	0.000298877
0.01	0.27				0.516248		70.078	13.6051						19.9918	24.9961	40.9325	15.9364	0.000113207
0.01	0.28				0.487513		73.0785	14.1281						19.9802	24.9962	42.4383	17.4421	4.28782e-05
0.01	0.29				0.440282		78.6182	15.0894						19.9759	24.9962	43.9346	18.9383	1.62403e-05
0.01	0.3				0.37473		87.8857	16.685						19.9742	24.9962	45.4148	20.4186	6.15108e-06
0.01	0.31				0.30228		101.109	18.9351						19.9736	24.9962	46.8726	21.8763	2.32974e-06
0.01	0.32				0.239855		116.264	21.4762						19.9733	24.9962	48.3049	23.3087	8.82392e-07
0.01	0.33				0.196603		129.832	23.7177						19.9733	24.9962	49.7149	24.7186	3.34207e-07
0.01	0.34				0.170962		139.541	25.3025						19.9732	24.9962	51.1089	26.1127	1.26581e-07
0.01	0.35				0.157143		145.424	26.2553						19.9732	24.9962	52.4935	27.4973	4.79426e-08
0.01	0.36				0.150078		148.636	26.7731						19.9732	24.9962	53.8729	28.8766	1.8158e-08
0.01	0.37				0.146562		150.29	27.0391						19.9732	24.9962	55.2496	30.2534	6.87708e-09
0.01	0.38				0.144836		151.116	27.1718						19.9732	24.9962	56.625	31.6288	2.60443e-09
0.01	0.39				0.143994		151.523	27.237						19.9732	24.9962	57.9997	33.0035	9.8618e-10
0.01	0.4				0.143585		151.721	27.2688						19.9732	24.9962	59.3742	34.3779	3.73287e-10
0.01	0.41				0.143387		151.817	27.2842						19.9732	24.9962	60.7484	35.7522	1.41174e-10
0.01	0.42				0.14329		151.864	27.2917						19.9732	24.9962	62.1226	37.1264	5.32836e-11
0.01	0.43				0.143244		151.887	27.2954						19.9732	24.9962	63.4968	38.5005	2.00195e-11
0.01	0.44				0.143221		151.898	27.2971						19.9732	24.9962	64.8709	39.8747	7.44294e-12
0.01	0.45				0.14321		151.903	27.298						19.9732	24.9962	66.245	41.2488	2.70362e-12
0.01	0.46				0.143205		151.906	27.2984						19.9732	24.9962	67.6192	42.6229	9.30811e-13
0.01	0.47				0.143202		151.907	27.2986						19.9732	24.9962	68.9933	43.9971	2.84217e-13
0.01	0.48				0.143201		151.908	27.2987						19.9732	24.9962	70.3674	45.3712	6.03961e-14
0.01	0.49				0.143201		151.908	27.2988						19.9732	24.9962	71.7415	46.7453	0
0.01	0.5				0.1432		151.908	27.2988						19.9732	24.9962	73.1157	48.1194	0
X	Cum X		Time(min)	bulk Density	Theta G	Intital C (total)	Initial Cw	Initial Ca	a	b	y0	x0	Ci (calculated from equation fit in sigma plot)	Adosrbed N	Integral Adsorbed N-Ci [cm/sec1/2] A	Area X x sec L	Area rectangle - solute integral	Total integral- sum of integral	Avg front	stddev Front
			Immiscible
0.01	0.01		80	1.0316	0.5467	47.95	67.0617	13.1448	143.767	-0.0183	14.6521	0.1958	158.416	158.414	1.43762	1.45271	0.0150972	25.9932
0.01	0.02				0.5467		67.0617	13.1448						158.41	2.87519	2.90543	0.030235	24.5557
0.01	0.03				0.5467		67.0617	13.1448						158.403	4.3127	4.35814	0.0454432	23.1182
0.01	0.04				0.5467		67.0617	13.1448						158.39	5.75008	5.81085	0.0607729	21.6808
0.01	0.05				0.5467		67.0617	13.1448						158.369	7.18725	7.26357	0.0763122	20.2436
0.01	0.06				0.5467		67.0617	13.1448						158.333	8.62406	8.71628	0.0922136	18.8068
0.01	0.07				0.5467		67.0617	13.1448						158.271	10.0603	10.169	0.10874	17.3706
0.01	0.08				0.5467		67.0617	13.1448						158.163	11.4954	11.6217	0.126344	15.9355
0.01	0.09				0.5467		67.0617	13.1448						157.977	12.9286	13.0744	0.145805	14.5022
0.01	0.1				0.546699		67.0617	13.1448						157.658	14.3587	14.5271	0.168464	13.0722
0.01	0.11				0.546698		67.0618	13.1448						157.109	15.7832	15.9798	0.196612	11.6476
0.01	0.12				0.546697		67.0619	13.1448						156.171	17.1984	17.4326	0.234139	10.2324
0.01	0.13				0.546694		67.0622	13.1448						154.579	18.5977	18.8853	0.28758	8.83317
0.01	0.14				0.54669		67.0626	13.1449						151.913	19.9703	20.338	0.367679	7.46055
0.01	0.15				0.546681		67.0634	13.1451						147.541	21.2992	21.7907	0.491501	6.13167
0.01	0.16				0.546664		67.0649	13.1453						140.611	22.5588	23.2434	0.68462	4.87208
0.01	0.17				0.546634		67.0678	13.1458						130.204	23.7143	24.6961	0.981808	3.71656
0.01	0.18				0.546577		67.073	13.1467						115.773	24.7255	26.1488	1.42329	2.70535
0.01	0.19				0.546472		67.0826	13.1484						97.8327	25.5573	27.6015	2.04416	1.87355
0.01	0.2				0.546277		67.1005	13.1515						78.3228	26.194	29.0541	2.8601	1.23684
0.01	0.21				0.545917		67.1336	13.1573						59.9664	26.6472	30.5067	3.85954	0.783696
0.01	0.22				0.545251		67.1949	13.168						44.9034	26.9497	31.9592	5.00951	0.481183
0.01	0.23				0.544022		67.3083	13.1879						33.8701	27.1419	33.4115	6.26961	0.289003
0.01	0.24				0.541763		67.5178	13.2245						26.4429	27.2598	34.8634	7.60362	0.171095
0.01	0.25				0.537639		67.9036	13.2919						21.7232	27.3305	36.3146	8.98415	0.100384
0.01	0.26				0.530209		68.6101	13.4152						18.8328	27.3723	37.7646	10.3924	0.0585769
0.01	0.27				0.517131		69.8904	13.6385						17.1028	27.3968	39.2124	11.8156	0.0340704
0.01	0.28				0.495026		72.1678	14.0349						16.0813	27.4111	40.6562	13.2451	0.0197785
0.01	0.29				0.460107		76.0878	14.715						15.4831	27.4194	42.0932	14.6738	0.0114687
0.01	0.3				0.410438		82.4693	15.8163						15.1344	27.4242	43.5192	16.095	0.00664563
0.01	0.31				0.349391		91.9746	17.4429						14.9318	27.427	44.929	17.502	0.00384914
0.01	0.32				0.286515		104.419	19.5482						14.8142	27.4286	46.3176	18.889	0.00222868
0.01	0.33				0.232507		118.23	21.8532						14.746	27.4296	47.6833	20.2537	0.00129001
0.01	0.34				0.192893		131.017	23.9581						14.7065	27.4301	49.0278	21.5977	0.000746413
0.01	0.35				0.167075		141.011	25.5842						14.6836	27.4304	50.3562	22.9257	0.000431652
0.01	0.36				0.151519		147.835	26.685						14.6703	27.4306	51.6735	24.2429	0.000249425
0.01	0.37				0.142587		152.073	27.3649						14.6627	27.4307	52.984	25.5533	0.000143946
0.01	0.38				0.1376		154.551	27.7611						14.6582	27.4308	54.2905	26.8598	8.29074e-05
0.01	0.39				0.134858		155.95	27.9843						14.6556	27.4308	55.5949	28.164	4.76021e-05
0.01	0.4				0.133364		156.724	28.1076						14.6541	27.4308	56.8979	29.4671	2.71965e-05
0.01	0.41				0.132553		157.147	28.175						14.6533	27.4308	58.2003	30.7695	1.54181e-05
0.01	0.42				0.132115		157.377	28.2116						14.6528	27.4308	59.5024	32.0715	8.63487e-06
0.01	0.43				0.131878		157.501	28.2314						14.6525	27.4308	60.8042	33.3734	4.74389e-06
0.01	0.44				0.13175		157.568	28.2421						14.6523	27.4309	62.106	34.6751	2.52753e-06
0.01	0.45				0.131681		157.605	28.2479						14.6522	27.4309	63.4077	35.9768	1.28078e-06
0.01	0.46				0.131644		157.624	28.251						14.6522	27.4309	64.7093	37.2785	5.95445e-07
0.01	0.47				0.131624		157.635	28.2527						14.6521	27.4309	66.0109	38.5801	2.35166e-07
0.01	0.48				0.131613		157.641	28.2536						14.6521	27.4309	67.3126	39.8817	6.30961e-08
0.01	0.49				0.131607		157.644	28.2541						14.6521	27.4309	68.6142	41.1833	0
0.01	0.5				0.131604		157.645	28.2543						14.6521	27.4309	69.9158	42.485	0
X	Cum X		Time(min)	bulk Density	Theta G	Intital C (total)	Initial Cw	Initial Ca	a	b	y0	x0	Ci (calculated from equation fit in sigma plot)	Adosrbed N	Integral Adsorbed N-Ci [cm/sec1/2] A	Area X x sec L	Area rectangle - solute integral	Total integral- sum of integral	Avg front	stddev Front
			Immiscible
0.01	0.01		320	1.03268	0.5451	47.95	67.2611	13.1434	146.111	-0.0104	15.6786	0.1747	158.416	161.79	1.46111	1.45273	-0.00838738	23.334
0.01	0.02				0.5451		67.2611	13.1434						161.79	2.92223	2.90545	-0.0167745	21.8729
0.01	0.03				0.5451		67.2611	13.1434						161.79	4.38334	4.35818	-0.0251607	20.4118
0.01	0.04				0.5451		67.2611	13.1434						161.79	5.84445	5.81091	-0.0335449	18.9507
0.01	0.05				0.5451		67.2611	13.1434						161.789	7.30556	7.26363	-0.0419234	17.4895
0.01	0.06				0.545099		67.2611	13.1434						161.788	8.76665	8.71636	-0.0502874	16.0285
0.01	0.07				0.545099		67.2612	13.1434						161.784	10.2277	10.1691	-0.0586131	14.5674
0.01	0.08				0.545098		67.2613	13.1434						161.774	11.6886	11.6218	-0.0668388	13.1065
0.01	0.09				0.545097		67.2614	13.1435						161.748	13.1493	13.0745	-0.0748027	11.6458
0.01	0.1				0.545094		67.2616	13.1435						161.679	14.6093	14.5273	-0.0820821	10.1858
0.01	0.11				0.54509		67.2621	13.1436						161.5	16.0676	15.98	-0.087574	8.72754
0.01	0.12				0.545081		67.2628	13.1437						161.035	17.5211	17.4327	-0.08841	7.27398
0.01	0.13				0.545066		67.2642	13.144						159.83	18.9626	18.8854	-0.0772061	5.83247
0.01	0.14				0.545039		67.2667	13.1444						156.773	20.3736	20.3381	-0.0354308	4.42153
0.01	0.15				0.54499		67.2713	13.1452						149.356	21.7104	21.7909	0.0805033	3.08475
0.01	0.16			0.01	0.544901		67.2794	13.1466						133.198	22.8855	23.2436	0.358007	1.90956
0.01	0.17				0.544742		67.2941	13.1492						104.967	23.7784	24.6962	0.917794	1.01668
0.01	0.18				0.544456		67.3205	13.1538						70.5118	24.3268	26.1488	1.82208	0.468347
0.01	0.19				0.543942		67.368	13.1621						42.9674	24.5996	27.6014	3.00174	0.195459
0.01	0.2				0.54302		67.4535	13.1771						27.4718	24.7176	29.0538	4.33619	0.0775274
0.01	0.21				0.541368		67.607	13.2039						20.4238	24.765	30.5059	5.74086	0.0300759
0.01	0.22				0.538426		67.8823	13.2521						17.5298	24.7835	31.9575	7.17399	0.0115636
0.01	0.23				0.533229		68.3741	13.338						16.3919	24.7907	33.4083	8.61764	0.0044305
0.01	0.24				0.524186		69.2471	13.4905						15.9521	24.7934	34.8576	10.0642	0.00169522
0.01	0.25				0.508854		70.7801	13.7579						15.7833	24.7945	36.3041	11.5097	0.000648296
0.01	0.26				0.483967		73.4198	14.2174						15.7186	24.7949	37.7461	12.9513	0.000247877
0.01	0.27				0.446291		77.8178	14.98						15.6939	24.795	39.1805	14.3855	9.47688e-05
0.01	0.28				0.394884		84.7573	16.1763						15.6845	24.7951	40.6029	15.8078	3.62312e-05
0.01	0.29				0.333853		94.8248	17.8963						15.6808	24.7951	42.0081	17.213	1.38514e-05
0.01	0.3				0.272306		107.79	20.085						15.6795	24.7951	43.3914	18.5963	5.29547e-06
0.01	0.31				0.219652		122.16	22.4766						15.6789	24.7951	44.7508	19.9557	2.02448e-06
0.01	0.32				0.180582		135.665	24.6924						15.6787	24.7951	46.088	21.2929	7.73968e-07
0.01	0.33				0.154546		146.526	26.4522						15.6786	24.7951	47.4077	22.6126	2.95891e-07
0.01	0.34				0.138415		154.213	27.686						15.6786	24.7951	48.715	23.9199	1.1312e-07
0.01	0.35				0.128869		159.172	28.4769						15.6786	24.7951	50.0144	25.2193	4.32459e-08
0.01	0.36				0.123372		162.182	28.955						15.6786	24.7951	51.309	26.5139	1.65328e-08
0.01	0.37				0.120256		163.941	29.2338						15.6786	24.7951	52.6008	27.8057	6.32024e-09
0.01	0.38				0.118506		164.947	29.393						15.6786	24.7951	53.891	29.0959	2.41597e-09
0.01	0.39				0.117528		165.515	29.4828						15.6786	24.7951	55.1804	30.3853	9.23375e-10
0.01	0.4				0.116983		165.834	29.5331						15.6786	24.7951	56.4692	31.6741	3.52774e-10
0.01	0.41				0.116679		166.011	29.5612						15.6786	24.7951	57.7577	32.9626	1.34655e-10
0.01	0.42				0.116511		166.11	29.5769						15.6786	24.7951	59.0461	34.251	5.12905e-11
0.01	0.43				0.116417		166.165	29.5855						15.6786	24.7951	60.3344	35.5393	1.9444e-11
0.01	0.44				0.116365		166.196	29.5904						15.6786	24.7951	61.6227	36.8276	7.29372e-12
0.01	0.45				0.116336		166.213	29.5931						15.6786	24.7951	62.9109	38.1158	2.67164e-12
0.01	0.46				0.11632		166.222	29.5945						15.6786	24.7951	64.1991	39.404	9.27258e-13
0.01	0.47				0.116311		166.227	29.5954						15.6786	24.7951	65.4873	40.6922	2.84217e-13
0.01	0.48				0.116306		166.23	29.5958						15.6786	24.7951	66.7755	41.9804	6.03961e-14
0.01	0.49				0.116303		166.232	29.5961						15.6786	24.7951	68.0637	43.2686	0
0.01	0.5				0.116302		166.233	29.5962						15.6786	24.7951	69.3519	44.5568	0
